# Supplementary material
Source: MDPI journal article supplement (https://www.mdpi.com/2304-6740/8/1/1)

# checkCIF/PLATON report

Structure factors have been supplied for datablock(s) I

THIS REPORT IS FOR GUIDANCE ONLY. IF USED AS PART OF A REVIEW PROCEDURE FOR PUBLICATION, IT SHOULD NOT REPLACE THE EXPERTISE OF AN EXPERIENCED CRYSTALLOGRAPHIC REFEREE.

No syntax errors found.      CIF dictionary      Interpreting this report

## Datablock: I

---

|                        |                               |                                                  |
|------------------------|-------------------------------|--------------------------------------------------|
| Bond precision:        | C-C = 0.0129 Å                | Wavelength=1.54184                               |
| Cell:                  | a=25.0842(6)                  | b=25.0842(6)      c=43.3591(10)                  |
|                        | alpha=90                      | beta=90      gamma=120                           |
| Temperature:           | 150 K                         |                                                  |
|                        | Calculated                    | Reported                                         |
| Volume                 | 23627.2(14)                   | 23627.1(10)                                      |
| Space group            | P 32 2 1                      | P 32 2 1                                         |
| Hall group             | P 32 2"                       | P 32 2"                                          |
| Moiety formula         | C244 H252 N6 O12 Ru6, 2(C H3) | C246 H258 N6 O12 Ru6, 6 (C F3 O3 S), 40( C H4 O) |
| Sum formula            | C246 H258 N6 O12 Ru6          | C292 H418 F18 N6 O70 Ru6 S6                      |
| Mr                     | 4097.02                       | 6273.10                                          |
| Dx, g cm <sup>-3</sup> | 0.864                         | 1.323                                            |
| Z                      | 3                             | 3                                                |
| Mu (mm <sup>-1</sup> ) | 2.590                         | 3.360                                            |
| F000                   | 6408.0                        | 9882.0                                           |
| F000'                  | 6424.20                       |                                                  |
| h,k,lmax               | 31,31,53                      | 30,30,53                                         |
| Nref                   | 31427[ 16829]                 | 30698                                            |
| Tmin,Tmax              | 0.355,0.353                   | 0.063,1.000                                      |
| Tmin'                  | 0.268                         |                                                  |

Correction method= # Reported T Limits: Tmin=0.063 Tmax=1.000  
AbsCorr = MULTI-SCAN

Data completeness= 1.82/0.98      Theta(max)= 72.880

R(reflections)= 0.0605( 19178)      wR2(reflections)= 0.1956( 30698)

S = 0.965      Npar= 1203

---

The following ALERTS were generated. Each ALERT has the format

**test-name\_ALERT\_alert-type\_alert-level.**

Click on the hyperlinks for more details of the test.

---

### Alert level A

CHEMW03\_ALERT\_2\_A ALERT: The ratio of given/expected molecular weight as calculated from the \_atom\_site\* data lies outside the range 0.90 <> 1.10

From the CIF: \_cell\_formula\_units\_Z 3

From the CIF: \_chemical\_formula\_weight 6273.10

TEST: Calculate formula weight from \_atom\_site\_\*

| atom | mass   | num    | sum     |
|------|--------|--------|---------|
| C    | 12.01  | 246.00 | 2954.71 |
| H    | 1.01   | 258.00 | 260.06  |
| F    | 19.00  | 0.00   | 0.00    |
| N    | 14.01  | 6.00   | 84.04   |
| O    | 16.00  | 12.00  | 191.99  |
| Ru   | 101.07 | 6.00   | 606.42  |
| S    | 32.07  | 0.00   | 0.00    |

Calculated formula weight 4097.22

**Author Response: The unit cell contains solvent and anions atoms which were not modelled but the corresponding scattering contribution were taken into account using SQUEEZE/PLATON procedure. The full composition (with triflates anions and methanol molecules) was included in the calculation of the empirical formula,molecular weight,density, linear absorption coefficient and F(000).**

---

### Alert level B

| PLAT220_ALERT_2_B | Non-Solvent Resd 1                             | C    | Ueq(max)/Ueq(min) | Range | 7.3   | Ratio |
|-------------------|------------------------------------------------|------|-------------------|-------|-------|-------|
| PLAT230_ALERT_2_B | Hirshfeld Test Diff for                        | O2   | -- C108           | ..    | 11.0  | s.u.  |
| PLAT230_ALERT_2_B | Hirshfeld Test Diff for                        | N1   | -- C16            | ..    | 8.6   | s.u.  |
| PLAT230_ALERT_2_B | Hirshfeld Test Diff for                        | C38  | -- C39            | ..    | 8.2   | s.u.  |
| PLAT230_ALERT_2_B | Hirshfeld Test Diff for                        | C44  | -- C45            | ..    | 11.3  | s.u.  |
| PLAT230_ALERT_2_B | Hirshfeld Test Diff for                        | C55  | -- C56            | ..    | 8.6   | s.u.  |
| PLAT230_ALERT_2_B | Hirshfeld Test Diff for                        | C57  | -- C58            | ..    | 10.0  | s.u.  |
| PLAT230_ALERT_2_B | Hirshfeld Test Diff for                        | C59  | -- C60            | ..    | 12.2  | s.u.  |
| PLAT230_ALERT_2_B | Hirshfeld Test Diff for                        | C71  | -- C72            | ..    | 21.9  | s.u.  |
| PLAT230_ALERT_2_B | Hirshfeld Test Diff for                        | C90  | -- C91            | ..    | 8.0   | s.u.  |
| PLAT230_ALERT_2_B | Hirshfeld Test Diff for                        | C91  | -- C92            | ..    | 14.0  | s.u.  |
| PLAT230_ALERT_2_B | Hirshfeld Test Diff for                        | C94  | -- C95            | ..    | 9.0   | s.u.  |
| PLAT230_ALERT_2_B | Hirshfeld Test Diff for                        | C100 | -- C101           | ..    | 9.9   | s.u.  |
| PLAT230_ALERT_2_B | Hirshfeld Test Diff for                        | C101 | -- C102           | ..    | 9.7   | s.u.  |
| PLAT230_ALERT_2_B | Hirshfeld Test Diff for                        | C102 | -- C103           | ..    | 8.4   | s.u.  |
| PLAT230_ALERT_2_B | Hirshfeld Test Diff for                        | C107 | -- C108           | ..    | 10.0  | s.u.  |
| PLAT230_ALERT_2_B | Hirshfeld Test Diff for                        | C107 | -- C116           | ..    | 7.8   | s.u.  |
| PLAT230_ALERT_2_B | Hirshfeld Test Diff for                        | C112 | -- C113           | ..    | 8.0   | s.u.  |
| PLAT230_ALERT_2_B | Hirshfeld Test Diff for                        | C114 | -- C115           | ..    | 10.3  | s.u.  |
| PLAT230_ALERT_2_B | Hirshfeld Test Diff for                        | C116 | -- C117           | ..    | 8.4   | s.u.  |
| PLAT230_ALERT_2_B | Hirshfeld Test Diff for                        | C119 | -- C120           | ..    | 8.7   | s.u.  |
| PLAT234_ALERT_4_B | Large Hirshfeld Difference                     | C65  | -- C66            | ..    | 0.28  | Ang.  |
| PLAT234_ALERT_4_B | Large Hirshfeld Difference                     | C88  | -- C89            | ..    | 0.28  | Ang.  |
| PLAT241_ALERT_2_B | High 'MainMol' Ueq as Compared to Neighbors of | C49  |                   |       | Check |       |
| PLAT241_ALERT_2_B | High 'MainMol' Ueq as Compared to Neighbors of | C82  |                   |       | Check |       |
| PLAT241_ALERT_2_B | High 'MainMol' Ueq as Compared to Neighbors of | C89  |                   |       | Check |       |
| PLAT241_ALERT_2_B | High 'MainMol' Ueq as Compared to Neighbors of | C91  |                   |       | Check |       |

|                   |          |                    |                                 |      |        |
|-------------------|----------|--------------------|---------------------------------|------|--------|
| PLAT241_ALERT_2_B | High     | 'MainMol'          | Ueq as Compared to Neighbors of | C93  | Check  |
| PLAT241_ALERT_2_B | High     | 'MainMol'          | Ueq as Compared to Neighbors of | C111 | Check  |
| PLAT241_ALERT_2_B | High     | 'MainMol'          | Ueq as Compared to Neighbors of | C112 | Check  |
| PLAT241_ALERT_2_B | High     | 'MainMol'          | Ueq as Compared to Neighbors of | C121 | Check  |
| PLAT242_ALERT_2_B | Low      | 'MainMol'          | Ueq as Compared to Neighbors of | C48  | Check  |
| PLAT242_ALERT_2_B | Low      | 'MainMol'          | Ueq as Compared to Neighbors of | C65  | Check  |
| PLAT242_ALERT_2_B | Low      | 'MainMol'          | Ueq as Compared to Neighbors of | C88  | Check  |
| PLAT242_ALERT_2_B | Low      | 'MainMol'          | Ueq as Compared to Neighbors of | C92  | Check  |
| PLAT360_ALERT_2_B | Short    | C(sp3)-C(sp3) Bond | C61 - C62 ..                    | 1.27 | Ang.   |
| PLAT369_ALERT_2_B | Long     | C(sp2)-C(sp2) Bond | C78 - C83 ..                    | 1.58 | Ang.   |
| PLAT732_ALERT_1_B | Angle    | Calc               | 71.6(8), Rep 71.53(19) .....    | 4.21 | s.u.-R |
|                   | C92 -C93 | -RU3               | 1.555 1.555 1.555 #             | 437  |        |
| PLAT732_ALERT_1_B | Angle    | Calc               | 37.7(6), Rep 37.68(10) .....    | 6.00 | s.u.-R |
|                   | C93 -RU3 | -C88               | 1.555 1.555 1.555 #             | 641  |        |

### ● Alert level C

|                   |                            |                             |                                 |        |       |
|-------------------|----------------------------|-----------------------------|---------------------------------|--------|-------|
| PLAT213_ALERT_2_C | Atom C87                   | has ADP max/min Ratio ..... | 3.6                             | prolat |       |
| PLAT213_ALERT_2_C | Atom C91                   | has ADP max/min Ratio ..... | 3.5                             | prolat |       |
| PLAT213_ALERT_2_C | Atom C94                   | has ADP max/min Ratio ..... | 3.6                             | prolat |       |
| PLAT222_ALERT_3_C | Non-Solvent Resd 1         | H Uiso(max)/Uiso(min) Range | 7.7                             | Ratio  |       |
| PLAT230_ALERT_2_C | Hirshfeld Test Diff for    | N2 -- C29 ..                | 5.8                             | s.u.   |       |
| PLAT230_ALERT_2_C | Hirshfeld Test Diff for    | C26 -- C30 ..               | 5.8                             | s.u.   |       |
| PLAT230_ALERT_2_C | Hirshfeld Test Diff for    | C45 -- C46 ..               | 6.0                             | s.u.   |       |
| PLAT230_ALERT_2_C | Hirshfeld Test Diff for    | C47 -- C48 ..               | 6.9                             | s.u.   |       |
| PLAT230_ALERT_2_C | Hirshfeld Test Diff for    | C51 -- C52 ..               | 5.3                             | s.u.   |       |
| PLAT230_ALERT_2_C | Hirshfeld Test Diff for    | C52 -- C53 ..               | 6.1                             | s.u.   |       |
| PLAT230_ALERT_2_C | Hirshfeld Test Diff for    | C61 -- C62 ..               | 5.1                             | s.u.   |       |
| PLAT230_ALERT_2_C | Hirshfeld Test Diff for    | C70 -- C71 ..               | 7.0                             | s.u.   |       |
| PLAT230_ALERT_2_C | Hirshfeld Test Diff for    | C71 -- C74 ..               | 6.9                             | s.u.   |       |
| PLAT230_ALERT_2_C | Hirshfeld Test Diff for    | C77 -- C78 ..               | 6.3                             | s.u.   |       |
| PLAT234_ALERT_4_C | Large Hirshfeld Difference | Ru1 -- C68 ..               | 0.17                            | Ang.   |       |
| PLAT234_ALERT_4_C | Large Hirshfeld Difference | Ru2 -- C78 ..               | 0.18                            | Ang.   |       |
| PLAT234_ALERT_4_C | Large Hirshfeld Difference | Ru3 -- C88 ..               | 0.21                            | Ang.   |       |
| PLAT234_ALERT_4_C | Large Hirshfeld Difference | Ru3 -- C90 ..               | 0.23                            | Ang.   |       |
| PLAT234_ALERT_4_C | Large Hirshfeld Difference | O3 -- C117 ..               | 0.19                            | Ang.   |       |
| PLAT234_ALERT_4_C | Large Hirshfeld Difference | O5 -- C100 ..               | 0.17                            | Ang.   |       |
| PLAT234_ALERT_4_C | Large Hirshfeld Difference | N3 -- C41 ..                | 0.19                            | Ang.   |       |
| PLAT234_ALERT_4_C | Large Hirshfeld Difference | C29 -- C30 ..               | 0.16                            | Ang.   |       |
| PLAT234_ALERT_4_C | Large Hirshfeld Difference | C53 -- C54 ..               | 0.18                            | Ang.   |       |
| PLAT234_ALERT_4_C | Large Hirshfeld Difference | C60 -- C61 ..               | 0.21                            | Ang.   |       |
| PLAT234_ALERT_4_C | Large Hirshfeld Difference | C68 -- C73 ..               | 0.19                            | Ang.   |       |
| PLAT234_ALERT_4_C | Large Hirshfeld Difference | C84 -- C85 ..               | 0.19                            | Ang.   |       |
| PLAT234_ALERT_4_C | Large Hirshfeld Difference | C97 -- C98 ..               | 0.24                            | Ang.   |       |
| PLAT234_ALERT_4_C | Large Hirshfeld Difference | C98 -- C99 ..               | 0.19                            | Ang.   |       |
| PLAT234_ALERT_4_C | Large Hirshfeld Difference | C99 -- C103_a ..            | 0.17                            | Ang.   |       |
| PLAT234_ALERT_4_C | Large Hirshfeld Difference | C103 -- C99_a ..            | 0.17                            | Ang.   |       |
| PLAT234_ALERT_4_C | Large Hirshfeld Difference | C104 -- C105 ..             | 0.23                            | Ang.   |       |
| PLAT234_ALERT_4_C | Large Hirshfeld Difference | C117 -- C118 ..             | 0.18                            | Ang.   |       |
| PLAT234_ALERT_4_C | Large Hirshfeld Difference | C120 -- C121 ..             | 0.22                            | Ang.   |       |
| PLAT241_ALERT_2_C | High                       | 'MainMol'                   | Ueq as Compared to Neighbors of | C16    | Check |
| PLAT241_ALERT_2_C | High                       | 'MainMol'                   | Ueq as Compared to Neighbors of | C40    | Check |
| PLAT241_ALERT_2_C | High                       | 'MainMol'                   | Ueq as Compared to Neighbors of | C61    | Check |
| PLAT241_ALERT_2_C | High                       | 'MainMol'                   | Ueq as Compared to Neighbors of | C69    | Check |
| PLAT241_ALERT_2_C | High                       | 'MainMol'                   | Ueq as Compared to Neighbors of | C72    | Check |
| PLAT241_ALERT_2_C | High                       | 'MainMol'                   | Ueq as Compared to Neighbors of | C73    | Check |
| PLAT241_ALERT_2_C | High                       | 'MainMol'                   | Ueq as Compared to Neighbors of | C78    | Check |
| PLAT241_ALERT_2_C | High                       | 'MainMol'                   | Ueq as Compared to Neighbors of | C79    | Check |
| PLAT241_ALERT_2_C | High                       | 'MainMol'                   | Ueq as Compared to Neighbors of | C83    | Check |
| PLAT241_ALERT_2_C | High                       | 'MainMol'                   | Ueq as Compared to Neighbors of | C119   | Check |
| PLAT242_ALERT_2_C | Low                        | 'MainMol'                   | Ueq as Compared to Neighbors of | Ru1    | Check |

|                   |               |                                           |                                 |         |        |
|-------------------|---------------|-------------------------------------------|---------------------------------|---------|--------|
| PLAT242_ALERT_2_C | Low           | 'MainMol'                                 | Ueq as Compared to Neighbors of | Ru2     | Check  |
| PLAT242_ALERT_2_C | Low           | 'MainMol'                                 | Ueq as Compared to Neighbors of | Ru3     | Check  |
| PLAT242_ALERT_2_C | Low           | 'MainMol'                                 | Ueq as Compared to Neighbors of | C7      | Check  |
| PLAT242_ALERT_2_C | Low           | 'MainMol'                                 | Ueq as Compared to Neighbors of | C45     | Check  |
| PLAT242_ALERT_2_C | Low           | 'MainMol'                                 | Ueq as Compared to Neighbors of | C52     | Check  |
| PLAT242_ALERT_2_C | Low           | 'MainMol'                                 | Ueq as Compared to Neighbors of | C57     | Check  |
| PLAT242_ALERT_2_C | Low           | 'MainMol'                                 | Ueq as Compared to Neighbors of | C60     | Check  |
| PLAT242_ALERT_2_C | Low           | 'MainMol'                                 | Ueq as Compared to Neighbors of | C68     | Check  |
| PLAT242_ALERT_2_C | Low           | 'MainMol'                                 | Ueq as Compared to Neighbors of | C80     | Check  |
| PLAT242_ALERT_2_C | Low           | 'MainMol'                                 | Ueq as Compared to Neighbors of | C81     | Check  |
| PLAT242_ALERT_2_C | Low           | 'MainMol'                                 | Ueq as Compared to Neighbors of | C90     | Check  |
| PLAT242_ALERT_2_C | Low           | 'MainMol'                                 | Ueq as Compared to Neighbors of | C95     | Check  |
| PLAT242_ALERT_2_C | Low           | 'MainMol'                                 | Ueq as Compared to Neighbors of | C98     | Check  |
| PLAT242_ALERT_2_C | Low           | 'MainMol'                                 | Ueq as Compared to Neighbors of | C101    | Check  |
| PLAT242_ALERT_2_C | Low           | 'MainMol'                                 | Ueq as Compared to Neighbors of | C104    | Check  |
| PLAT242_ALERT_2_C | Low           | 'MainMol'                                 | Ueq as Compared to Neighbors of | C106    | Check  |
| PLAT242_ALERT_2_C | Low           | 'MainMol'                                 | Ueq as Compared to Neighbors of | C110    | Check  |
| PLAT242_ALERT_2_C | Low           | 'MainMol'                                 | Ueq as Compared to Neighbors of | C113    | Check  |
| PLAT242_ALERT_2_C | Low           | 'MainMol'                                 | Ueq as Compared to Neighbors of | C114    | Check  |
| PLAT242_ALERT_2_C | Low           | 'MainMol'                                 | Ueq as Compared to Neighbors of | C117    | Check  |
| PLAT242_ALERT_2_C | Low           | 'MainMol'                                 | Ueq as Compared to Neighbors of | C118    | Check  |
| PLAT242_ALERT_2_C | Low           | 'MainMol'                                 | Ueq as Compared to Neighbors of | C122    | Check  |
| PLAT342_ALERT_3_C | Low           | Bond Precision on C-C Bonds .....         |                                 | 0.01286 | Ang.   |
| PLAT360_ALERT_2_C | Short         | C(sp3)-C(sp3) Bond                        | C48 - C49 ..                    | 1.36    | Ang.   |
| PLAT361_ALERT_2_C | Long          | C(sp3)-C(sp3) Bond                        | C47 - C48 ..                    | 1.71    | Ang.   |
| PLAT368_ALERT_2_C | Short         | C(sp2)-C(sp2) Bond                        | C119 - C120 ..                  | 1.19    | Ang.   |
| PLAT369_ALERT_2_C | Long          | C(sp2)-C(sp2) Bond                        | C72 - C73 ..                    | 1.56    | Ang.   |
| PLAT410_ALERT_2_C | Short         | Intra H...H Contact                       | H22 .. H59B ..                  | 1.98    | Ang.   |
| PLAT410_ALERT_2_C | Short         | Intra H...H Contact                       | H34 .. H47B ..                  | 1.96    | Ang.   |
| PLAT412_ALERT_2_C | Short         | Intra XH3 .. XHn                          | H87B .. H89 ..                  | 1.87    | Ang.   |
| PLAT412_ALERT_2_C | Short         | Intra XH3 .. XHn                          | H90 .. H94B ..                  | 1.85    | Ang.   |
| PLAT413_ALERT_2_C | Short         | Inter XH3 .. XHn                          | H23 .. H94C ..                  | 2.02    | Ang.   |
| PLAT413_ALERT_2_C | Short         | Inter XH3 .. XHn                          | H92 .. H96B ..                  | 2.14    | Ang.   |
| PLAT732_ALERT_1_C | Angle         | Calc                                      | 70.7(8), Rep 70.7(2) .....      | 4.00    | s.u.-R |
|                   | C93 -C92      | -RU3                                      | 1.555 1.555 1.555 #             | 431     |        |
| PLAT732_ALERT_1_C | Angle         | Calc                                      | 71.9(7), Rep 71.9(2) .....      | 3.50    | s.u.-R |
|                   | C88 -C93      | -RU3                                      | 1.555 1.555 1.555 #             | 438     |        |
| PLAT732_ALERT_1_C | Angle         | Calc                                      | 37.7(4), Rep 37.75(11) .....    | 3.64    | s.u.-R |
|                   | C93 -RU3      | -C92                                      | 1.555 1.555 1.555 #             | 637     |        |
| PLAT732_ALERT_1_C | Angle         | Calc                                      | 67.8(5), Rep 67.84(15) .....    | 3.33    | s.u.-R |
|                   | C92 -RU3      | -C88                                      | 1.555 1.555 1.555 #             | 642     |        |
| PLAT732_ALERT_1_C | Angle         | Calc                                      | 79.6(4), Rep 79.60(12) .....    | 3.33    | s.u.-R |
|                   | C93 -RU3      | -C90                                      | 1.555 1.555 1.555 #             | 659     |        |
| PLAT732_ALERT_1_C | Angle         | Calc                                      | 67.1(5), Rep 67.15(13) .....    | 3.85    | s.u.-R |
|                   | C92 -RU3      | -C90                                      | 1.555 1.555 1.555 #             | 660     |        |
| PLAT732_ALERT_1_C | Angle         | Calc                                      | 67.0(4), Rep 67.01(15) .....    | 2.67    | s.u.-R |
|                   | C88 -RU3      | -C90                                      | 1.555 1.555 1.555 #             | 661     |        |
| PLAT906_ALERT_3_C | Large         | K value in the Analysis of Variance ..... |                                 | 3.196   | Check  |
| PLAT911_ALERT_3_C | Missing       | # FCF Refl Between THmin & STh/L= 0.600   |                                 | 9       | Report |
| PLAT918_ALERT_3_C | Reflection(s) | with I(obs) much Smaller I(calc) .        |                                 | 1       | Check  |

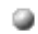

### Alert level G

FORMU01\_ALERT\_2\_G There is a discrepancy between the atom counts in the  
     \_chemical\_formula\_sum and the formula from the \_atom\_site\* data.  
     Atom count from \_chemical\_formula\_sum: C292 H418 F18 N6 O70 Ru6 S6  
     Atom count from the \_atom\_site data: C246 H258 N6 O12 Ru6

CELLZ01\_ALERT\_1\_G Difference between formula and atom\_site contents detected.  
 CELLZ01\_ALERT\_1\_G ALERT: Large difference may be due to a  
     symmetry error - see SYMMG tests  
     From the CIF: \_cell\_formula\_units\_Z     3

From the CIF: \_chemical\_formula\_sum C292 H418 F18 N6 O70 Ru6 S6  
 TEST: Compare cell contents of formula and atom\_site data

| atom              | Z*formula                                          | cif sites                        | diff       |              |
|-------------------|----------------------------------------------------|----------------------------------|------------|--------------|
| C                 | 876.00                                             | 738.00                           | 138.00     |              |
| H                 | 1254.00                                            | 774.00                           | 480.00     |              |
| F                 | 54.00                                              | 0.00                             | 54.00      |              |
| N                 | 18.00                                              | 18.00                            | 0.00       |              |
| O                 | 210.00                                             | 36.00                            | 174.00     |              |
| Ru                | 18.00                                              | 18.00                            | 0.00       |              |
| S                 | 18.00                                              | 0.00                             | 18.00      |              |
| PLAT002_ALERT_2_G | Number of Distance or Angle Restraints on AtSite   |                                  |            | 7 Note       |
| PLAT003_ALERT_2_G | Number of Uiso or Uij Restrained non-H Atoms ...   |                                  |            | 11 Report    |
| PLAT005_ALERT_5_G | No Embedded Refinement Details found in the CIF    |                                  |            | Please Do !  |
| PLAT033_ALERT_4_G | Flack x Value Deviates > 3.0 * sigma from Zero .   |                                  |            | 0.204 Note   |
| PLAT041_ALERT_1_G | Calc. and Reported SumFormula Strings Differ       |                                  |            | Please Check |
| PLAT042_ALERT_1_G | Calc. and Reported MoietyFormula Strings Differ    |                                  |            | Please Check |
| PLAT044_ALERT_1_G | Calculated and Reported Density Dx Differ by ..    |                                  |            | 0.4592 Check |
| PLAT051_ALERT_1_G | Mu(calc) and Mu(CIF) Ratio Differs from 1.0 by .   |                                  |            | 22.92 %      |
| PLAT068_ALERT_1_G | Reported F000 Differs from Calcd (or Missing)...   |                                  |            | Please Check |
| PLAT072_ALERT_2_G | SHELXL First Parameter in WGHT Unusually Large     |                                  |            | 0.11 Report  |
| PLAT152_ALERT_1_G | The Supplied and Calc. Volume s.u. Differ by ...   |                                  |            | 4 Units      |
| PLAT232_ALERT_2_G | Hirshfeld Test Diff (M-X)                          | Ru1                              | -- C69 ..  | 10.0 s.u.    |
| PLAT232_ALERT_2_G | Hirshfeld Test Diff (M-X)                          | Ru1                              | -- C72 ..  | 5.2 s.u.     |
| PLAT232_ALERT_2_G | Hirshfeld Test Diff (M-X)                          | Ru1                              | -- O2_a .. | 6.0 s.u.     |
| PLAT232_ALERT_2_G | Hirshfeld Test Diff (M-X)                          | Ru2                              | -- C79 ..  | 6.3 s.u.     |
| PLAT232_ALERT_2_G | Hirshfeld Test Diff (M-X)                          | Ru3                              | -- O3 ..   | 5.6 s.u.     |
| PLAT232_ALERT_2_G | Hirshfeld Test Diff (M-X)                          | Ru3                              | -- O4 ..   | 24.5 s.u.    |
| PLAT333_ALERT_2_G | Check Large Av C6-Ring C-C Dist.                   | C99                              | -C103_a    | 1.45 Ang.    |
| PLAT333_ALERT_2_G | Check Large Av C6-Ring C-C Dist.                   | C101                             | -C101_a    | 1.45 Ang.    |
| PLAT333_ALERT_2_G | Check Large Av C6-Ring C-C Dist.                   | C106                             | -C123      | 1.44 Ang.    |
| PLAT333_ALERT_2_G | Check Large Av C6-Ring C-C Dist.                   | C107                             | -C116      | 1.45 Ang.    |
| PLAT335_ALERT_2_G | Check Large C6 Ring C-C Range                      | C68                              | -C73       | 0.22 Ang.    |
| PLAT335_ALERT_2_G | Check Large C6 Ring C-C Range                      | C78                              | -C83       | 0.25 Ang.    |
| PLAT335_ALERT_2_G | Check Large C6 Ring C-C Range                      | C118                             | -C123      | 0.31 Ang.    |
| PLAT343_ALERT_2_G | Unusual sp?                                        | Angle Range in Main Residue for  |            | C95 Check    |
| PLAT344_ALERT_2_G | Unusual sp?                                        | Angle Range in Solvent/Ion for . |            | C96 Check    |
| PLAT367_ALERT_2_G | Long? C(sp?)-C(sp?) Bond                           | C91                              | - C95 ..   | 1.70 Ang.    |
| PLAT367_ALERT_2_G | Long? C(sp?)-C(sp?) Bond                           | C94                              | - C95 ..   | 1.69 Ang.    |
| PLAT432_ALERT_2_G | Short Inter X...Y Contact                          | C35                              | .. C73 ..  | 3.17 Ang.    |
| PLAT432_ALERT_2_G | Short Inter X...Y Contact                          | C91                              | .. C96 ..  | 2.65 Ang.    |
| PLAT432_ALERT_2_G | Short Inter X...Y Contact                          | C92                              | .. C96 ..  | 2.99 Ang.    |
| PLAT432_ALERT_2_G | Short Inter X...Y Contact                          | C95                              | .. C96 ..  | 1.81 Ang.    |
| PLAT606_ALERT_4_G | VERY LARGE Solvent Accessible VOID(S) in Structure |                                  |            | ! Info       |
| PLAT773_ALERT_2_G | Check long C-C Bond in CIF:                        | C47                              | -- C48 .   | 1.71 Ang.    |
| PLAT773_ALERT_2_G | Check long C-C Bond in CIF:                        | C91                              | -- C95 .   | 1.70 Ang.    |
| PLAT773_ALERT_2_G | Check long C-C Bond in CIF:                        | C95                              | -- C96 .   | 1.80 Ang.    |
| PLAT860_ALERT_3_G | Number of Least-Squares Restraints .....           |                                  |            | 39 Note      |
| PLAT869_ALERT_4_G | ALERTS Related to the use of SQUEEZE Suppressed    |                                  |            | ! Info       |
| PLAT910_ALERT_3_G | Missing # of FCF Reflection(s) Below Theta(Min)    |                                  |            | 2 Note       |
| PLAT912_ALERT_4_G | Missing # of FCF Reflections Above STh/L= 0.600    |                                  |            | 227 Note     |
| PLAT961_ALERT_5_G | Dataset Contains no Negative Intensities .....     |                                  |            | Please Check |

---

1 **ALERT level A** = Most likely a serious problem - resolve or explain  
 39 **ALERT level B** = A potentially serious problem, consider carefully  
 87 **ALERT level C** = Check. Ensure it is not caused by an omission or oversight  
 44 **ALERT level G** = General information/check it is not something unexpected

17 ALERT type 1 CIF construction/syntax error, inconsistent or missing data

120 ALERT type 2 Indicator that the structure model may be wrong or deficient  
7 ALERT type 3 Indicator that the structure quality may be low  
25 ALERT type 4 Improvement, methodology, query or suggestion  
2 ALERT type 5 Informative message, check

---

## Publication of your CIF

You should attempt to resolve as many as possible of the alerts in all categories. Often the minor alerts point to easily fixed oversights, errors and omissions in your CIF or refinement strategy, so attention to these fine details can be worthwhile. In order to resolve some of the more serious problems it may be necessary to carry out additional measurements or structure refinements. However, the nature of your study may justify the reported deviations from journal submission requirements and the more serious of these should be commented upon in the discussion or experimental section of a paper or in the "special\_details" fields of the CIF. *checkCIF* was carefully designed to identify outliers and unusual parameters, but every test has its limitations and alerts that are not important in a particular case may appear. Conversely, the absence of alerts does not guarantee there are no aspects of the results needing attention. It is up to the individual to critically assess their own results and, if necessary, seek expert advice.

If you wish to submit your CIF for publication in Acta Crystallographica Section C or E, you should upload your CIF via the web. If you wish to submit your CIF for publication in IUCrData, you should upload your CIF via the web. If your CIF is to form part of a submission to another IUCr journal, you will be asked, either during electronic submission or by the Co-editor handling your paper, to upload your CIF via our web site.

---

**PLATON version of 06/05/2016; check.def file version of 05/05/2016**

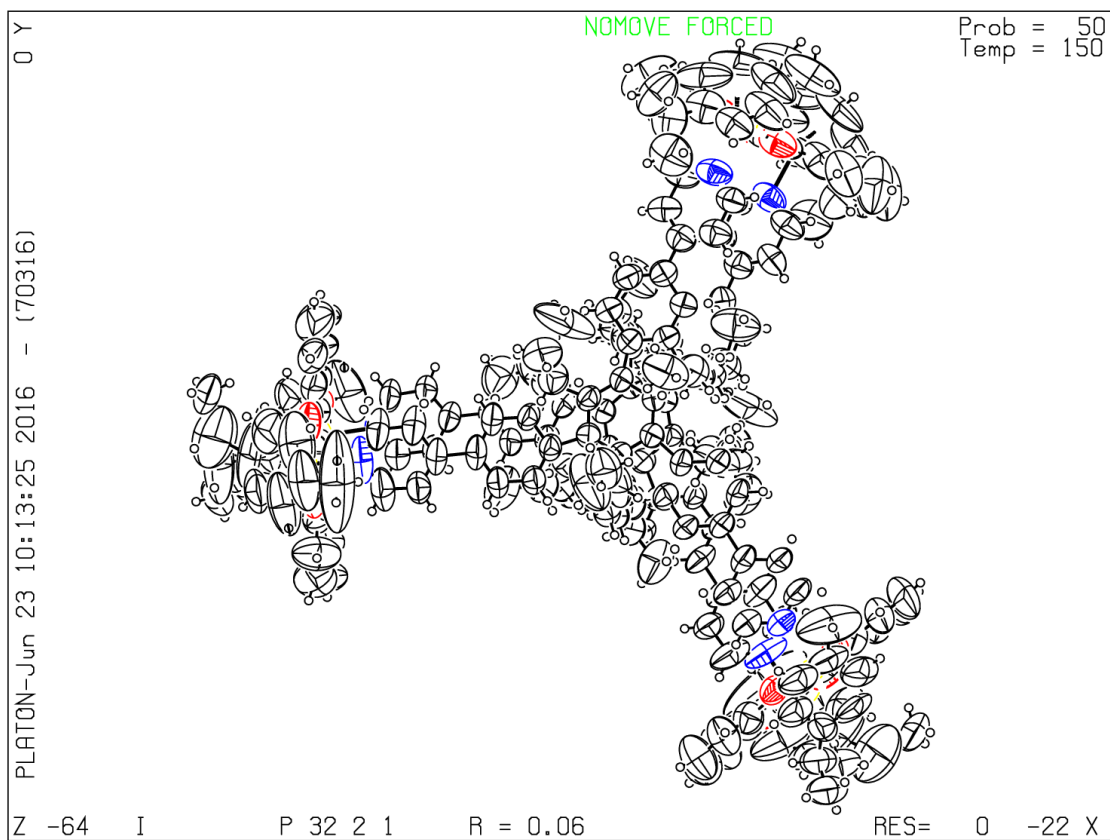

Supplement: s1 [file s1]
