# Supplementary material
Source: MDPI journal article supplement (https://www.mdpi.com/2304-6740/8/1/1)

# checkCIF/PLATON report

Structure factors have been supplied for datablock(s) I

THIS REPORT IS FOR GUIDANCE ONLY. IF USED AS PART OF A REVIEW PROCEDURE FOR PUBLICATION, IT SHOULD NOT REPLACE THE EXPERTISE OF AN EXPERIENCED CRYSTALLOGRAPHIC REFEREE.

No syntax errors found.      CIF dictionary      Interpreting this report

## Datablock: I

---

Bond precision:    C-C = 0.0190 Å                      Wavelength=1.54184

Cell:                      a=25.1943(5)              b=25.1943(5)              c=42.5843(7)  
                            alpha=90                      beta=90                      gamma=120  
Temperature:              150 K

|                        | Calculated                                | Reported                                                      |
|------------------------|-------------------------------------------|---------------------------------------------------------------|
| Volume                 | 23409.1(12)                               | 23409.1(10)                                                   |
| Space group            | P 31 2 1                                  | P 31 2 1                                                      |
| Hall group             | P 31 2"                                   | P 31 2"                                                       |
| Moiety formula         | C220 H240 N6 O12 Ru6, 2(C H3) [+ solvent] | 2(C66 H75 N3), 3 (C30 H32 O4 Ru2), 6 (C F3 S O3), 40 (C H4 O) |
| Sum formula            | C222 H246 N6 O12 Ru6 [+ solvent]          | C268 H418 F18 N6 O70 Ru6 S6                                   |
| Mr                     | 3796.68                                   | 5984.84                                                       |
| Dx, g cm <sup>-3</sup> | 0.808                                     | 1.274                                                         |
| Z                      | 3                                         | 3                                                             |
| Mu (mm <sup>-1</sup> ) | 2.586                                     | 3.364                                                         |
| F000                   | 5940.0                                    | 9450.0                                                        |
| F000'                  | 5954.98                                   |                                                               |
| h,k,lmax               | 31,31,52                                  | 30,30,51                                                      |
| Nref                   | 31124[ 16665]                             | 30645                                                         |
| Tmin,Tmax              | 0.466,0.590                               | 0.784,1.000                                                   |
| Tmin'                  | 0.394                                     |                                                               |

Correction method= # Reported T Limits: Tmin=0.784 Tmax=1.000  
AbsCorr = MULTI-SCAN

Data completeness= 1.84/0.98                      Theta(max)= 72.812

R(reflections)= 0.0503( 15980)              wR2(reflections)= 0.1904( 30645)

S = 0.945                      Npar= 1107

---

The following ALERTS were generated. Each ALERT has the format  
**test-name\_ALERT\_alert-type\_alert-level**.  
Click on the hyperlinks for more details of the test.

---

#### Alert level A

CHEMW03\_ALERT\_2\_A ALERT: The ratio of given/expected molecular weight as calculated from the \_atom\_site\* data lies outside the range 0.90 <> 1.10

From the CIF: \_cell\_formula\_units\_Z 3  
From the CIF: \_chemical\_formula\_weight 5984.84  
TEST: Calculate formula weight from \_atom\_site\_\*

| atom | mass   | num    | sum     |
|------|--------|--------|---------|
| C    | 12.01  | 222.00 | 2666.44 |
| H    | 1.01   | 246.00 | 247.97  |
| F    | 19.00  | 0.00   | 0.00    |
| N    | 14.01  | 6.00   | 84.04   |
| O    | 16.00  | 12.00  | 191.99  |
| Ru   | 101.07 | 6.00   | 606.42  |
| S    | 32.07  | 0.00   | 0.00    |

Calculated formula weight 3796.86

**Author Response: The unit cell contains disordered methanol molecules which were not modelled but the corresponding scattering contribution were taken into account using SQUEEZE/PLATON procedure. The solvent composition (120 methanol molecules/cell) was included in the calculation of the empirical formula, molecular weight, density, linear absorption coefficient and F(000).**

---

#### Alert level B

|                   |                            |                    |                                 |        |       |       |
|-------------------|----------------------------|--------------------|---------------------------------|--------|-------|-------|
| PLAT220_ALERT_2_B | Non-Solvent Resd 1         | C                  | Ueq(max)/Ueq(min)               | Range  | 8.4   | Ratio |
| PLAT230_ALERT_2_B | Hirshfeld Test Diff for    | N3                 | --C41                           | ..     | 8.4   | s.u.  |
| PLAT230_ALERT_2_B | Hirshfeld Test Diff for    | C59                | --C60                           | ..     | 7.2   | s.u.  |
| PLAT230_ALERT_2_B | Hirshfeld Test Diff for    | C65                | --C66                           | ..     | 19.0  | s.u.  |
| PLAT230_ALERT_2_B | Hirshfeld Test Diff for    | C68                | --C69                           | ..     | 9.0   | s.u.  |
| PLAT230_ALERT_2_B | Hirshfeld Test Diff for    | C75                | --C76                           | ..     | 8.0   | s.u.  |
| PLAT230_ALERT_2_B | Hirshfeld Test Diff for    | C92                | --C93                           | ..     | 10.3  | s.u.  |
| PLAT230_ALERT_2_B | Hirshfeld Test Diff for    | C93                | --C94                           | ..     | 7.3   | s.u.  |
| PLAT234_ALERT_4_B | Large Hirshfeld Difference | C76                | --                              | C81    | 0.30  | Ang.  |
| PLAT234_ALERT_4_B | Large Hirshfeld Difference | C77                | --                              | C78    | 0.26  | Ang.  |
| PLAT234_ALERT_4_B | Large Hirshfeld Difference | C84                | --                              | C85    | 0.30  | Ang.  |
| PLAT241_ALERT_2_B | High                       | 'MainMol'          | Ueq as Compared to Neighbors of | C65    | Check |       |
| PLAT241_ALERT_2_B | High                       | 'MainMol'          | Ueq as Compared to Neighbors of | C93    | Check |       |
| PLAT241_ALERT_2_B | High                       | 'MainMol'          | Ueq as Compared to Neighbors of | C96    | Check |       |
| PLAT241_ALERT_2_B | High                       | 'MainMol'          | Ueq as Compared to Neighbors of | C103   | Check |       |
| PLAT241_ALERT_2_B | High                       | 'MainMol'          | Ueq as Compared to Neighbors of | C107   | Check |       |
| PLAT242_ALERT_2_B | Low                        | 'MainMol'          | Ueq as Compared to Neighbors of | Ru2    | Check |       |
| PLAT242_ALERT_2_B | Low                        | 'MainMol'          | Ueq as Compared to Neighbors of | Ru3    | Check |       |
| PLAT242_ALERT_2_B | Low                        | 'MainMol'          | Ueq as Compared to Neighbors of | C57    | Check |       |
| PLAT242_ALERT_2_B | Low                        | 'MainMol'          | Ueq as Compared to Neighbors of | C92    | Check |       |
| PLAT242_ALERT_2_B | Low                        | 'MainMol'          | Ueq as Compared to Neighbors of | C104   | Check |       |
| PLAT369_ALERT_2_B | Long                       | C(sp2)-C(sp2) Bond | C102                            | - C107 | 1.59  | Ang.  |
| PLAT413_ALERT_2_B | Short                      | Inter XH3 .. XHn   | H11                             | ..H99C | 1.91  | Ang.  |

---

#### Alert level C

STRVA01\_ALERT\_4\_C Flack test results are ambiguous.

From the CIF: \_refine\_ls\_abs\_structure\_Flack 0.447

From the CIF: \_refine\_ls\_abs\_structure\_Flack\_su 0.009

|                   |                                                |                             |      |        |
|-------------------|------------------------------------------------|-----------------------------|------|--------|
| PLAT213_ALERT_2_C | Atom C98                                       | has ADP max/min Ratio ..... | 3.2  | prolat |
| PLAT213_ALERT_2_C | Atom C102                                      | has ADP max/min Ratio ..... | 3.3  | prolat |
| PLAT213_ALERT_2_C | Atom C107                                      | has ADP max/min Ratio ..... | 3.1  | prolat |
| PLAT213_ALERT_2_C | Atom C108                                      | has ADP max/min Ratio ..... | 3.8  | prolat |
| PLAT222_ALERT_3_C | Non-Solv. Resd 1 H                             | Uiso(max)/Uiso(min) Range   | 9.6  | Ratio  |
| PLAT230_ALERT_2_C | Hirshfeld Test Diff for C22                    | --C23 ..                    | 5.7  | s.u.   |
| PLAT230_ALERT_2_C | Hirshfeld Test Diff for C38                    | --C39 ..                    | 5.3  | s.u.   |
| PLAT230_ALERT_2_C | Hirshfeld Test Diff for C45                    | --C46 ..                    | 5.7  | s.u.   |
| PLAT230_ALERT_2_C | Hirshfeld Test Diff for C63                    | --C64 ..                    | 6.5  | s.u.   |
| PLAT230_ALERT_2_C | Hirshfeld Test Diff for C83                    | --C84 ..                    | 6.9  | s.u.   |
| PLAT230_ALERT_2_C | Hirshfeld Test Diff for C98                    | --C99 ..                    | 6.4  | s.u.   |
| PLAT230_ALERT_2_C | Hirshfeld Test Diff for C105                   | --C106 ..                   | 7.0  | s.u.   |
| PLAT234_ALERT_4_C | Large Hirshfeld Difference Ru1                 | -- C87                      | 0.22 | Ang.   |
| PLAT234_ALERT_4_C | Large Hirshfeld Difference Ru2                 | -- C97                      | 0.24 | Ang.   |
| PLAT234_ALERT_4_C | Large Hirshfeld Difference Ru3                 | -- C104                     | 0.17 | Ang.   |
| PLAT234_ALERT_4_C | Large Hirshfeld Difference O4                  | -- C81                      | 0.22 | Ang.   |
| PLAT234_ALERT_4_C | Large Hirshfeld Difference O6                  | -- C78                      | 0.20 | Ang.   |
| PLAT234_ALERT_4_C | Large Hirshfeld Difference N2                  | -- C28                      | 0.21 | Ang.   |
| PLAT234_ALERT_4_C | Large Hirshfeld Difference N2                  | -- C29                      | 0.22 | Ang.   |
| PLAT234_ALERT_4_C | Large Hirshfeld Difference N3                  | -- C40                      | 0.19 | Ang.   |
| PLAT234_ALERT_4_C | Large Hirshfeld Difference C3                  | -- C21                      | 0.16 | Ang.   |
| PLAT234_ALERT_4_C | Large Hirshfeld Difference C23                 | -- C24                      | 0.18 | Ang.   |
| PLAT234_ALERT_4_C | Large Hirshfeld Difference C26                 | -- C27                      | 0.18 | Ang.   |
| PLAT234_ALERT_4_C | Large Hirshfeld Difference C41                 | -- C42                      | 0.17 | Ang.   |
| PLAT234_ALERT_4_C | Large Hirshfeld Difference C60                 | -- C61                      | 0.18 | Ang.   |
| PLAT234_ALERT_4_C | Large Hirshfeld Difference C64                 | -- C65                      | 0.24 | Ang.   |
| PLAT234_ALERT_4_C | Large Hirshfeld Difference C67                 | -- C68                      | 0.21 | Ang.   |
| PLAT234_ALERT_4_C | Large Hirshfeld Difference C72                 | -- C73                      | 0.24 | Ang.   |
| PLAT234_ALERT_4_C | Large Hirshfeld Difference C72                 | -- C77                      | 0.19 | Ang.   |
| PLAT234_ALERT_4_C | Large Hirshfeld Difference C73                 | -- C74                      | 0.22 | Ang.   |
| PLAT234_ALERT_4_C | Large Hirshfeld Difference C79                 | -- C80                      | 0.24 | Ang.   |
| PLAT234_ALERT_4_C | Large Hirshfeld Difference C85                 | -- C86                      | 0.22 | Ang.   |
| PLAT234_ALERT_4_C | Large Hirshfeld Difference C88                 | -- C89                      | 0.22 | Ang.   |
| PLAT234_ALERT_4_C | Large Hirshfeld Difference C105                | -- C109                     | 0.21 | Ang.   |
| PLAT234_ALERT_4_C | Large Hirshfeld Difference C109                | -- C111                     | 0.22 | Ang.   |
| PLAT241_ALERT_2_C | High 'MainMol' Ueq as Compared to Neighbors of |                             | C28  | Check  |
| PLAT241_ALERT_2_C | High 'MainMol' Ueq as Compared to Neighbors of |                             | C40  | Check  |
| PLAT241_ALERT_2_C | High 'MainMol' Ueq as Compared to Neighbors of |                             | C68  | Check  |
| PLAT241_ALERT_2_C | High 'MainMol' Ueq as Compared to Neighbors of |                             | C73  | Check  |
| PLAT241_ALERT_2_C | High 'MainMol' Ueq as Compared to Neighbors of |                             | C75  | Check  |
| PLAT241_ALERT_2_C | High 'MainMol' Ueq as Compared to Neighbors of |                             | C79  | Check  |
| PLAT241_ALERT_2_C | High 'MainMol' Ueq as Compared to Neighbors of |                             | C84  | Check  |
| PLAT241_ALERT_2_C | High 'MainMol' Ueq as Compared to Neighbors of |                             | C85  | Check  |
| PLAT241_ALERT_2_C | High 'MainMol' Ueq as Compared to Neighbors of |                             | C97  | Check  |
| PLAT241_ALERT_2_C | High 'MainMol' Ueq as Compared to Neighbors of |                             | C102 | Check  |
| PLAT242_ALERT_2_C | Low 'MainMol' Ueq as Compared to Neighbors of  |                             | Ru1  | Check  |
| PLAT242_ALERT_2_C | Low 'MainMol' Ueq as Compared to Neighbors of  |                             | N2   | Check  |
| PLAT242_ALERT_2_C | Low 'MainMol' Ueq as Compared to Neighbors of  |                             | C26  | Check  |
| PLAT242_ALERT_2_C | Low 'MainMol' Ueq as Compared to Neighbors of  |                             | C42  | Check  |
| PLAT242_ALERT_2_C | Low 'MainMol' Ueq as Compared to Neighbors of  |                             | C45  | Check  |
| PLAT242_ALERT_2_C | Low 'MainMol' Ueq as Compared to Neighbors of  |                             | C53  | Check  |
| PLAT242_ALERT_2_C | Low 'MainMol' Ueq as Compared to Neighbors of  |                             | C61  | Check  |
| PLAT242_ALERT_2_C | Low 'MainMol' Ueq as Compared to Neighbors of  |                             | C64  | Check  |
| PLAT242_ALERT_2_C | Low 'MainMol' Ueq as Compared to Neighbors of  |                             | C69  | Check  |
| PLAT242_ALERT_2_C | Low 'MainMol' Ueq as Compared to Neighbors of  |                             | C72  | Check  |
| PLAT242_ALERT_2_C | Low 'MainMol' Ueq as Compared to Neighbors of  |                             | C74  | Check  |
| PLAT242_ALERT_2_C | Low 'MainMol' Ueq as Compared to Neighbors of  |                             | C76  | Check  |
| PLAT242_ALERT_2_C | Low 'MainMol' Ueq as Compared to Neighbors of  |                             | C77  | Check  |
| PLAT242_ALERT_2_C | Low 'MainMol' Ueq as Compared to Neighbors of  |                             | C80  | Check  |
| PLAT242_ALERT_2_C | Low 'MainMol' Ueq as Compared to Neighbors of  |                             | C88  | Check  |

|                   |          |                                           |         |        |
|-------------------|----------|-------------------------------------------|---------|--------|
| PLAT242_ALERT_2_C | Low      | 'MainMol' Ueq as Compared to Neighbors of | C94     | Check  |
| PLAT242_ALERT_2_C | Low      | 'MainMol' Ueq as Compared to Neighbors of | C98     | Check  |
| PLAT242_ALERT_2_C | Low      | 'MainMol' Ueq as Compared to Neighbors of | C105    | Check  |
| PLAT334_ALERT_2_C | Small    | Aver. Benzene C-C Dist C82 -C87           | 1.37    | Ang.   |
| PLAT342_ALERT_3_C | Low      | Bond Precision on C-C Bonds .....         | 0.01898 | Ang.   |
| PLAT360_ALERT_2_C | Short    | C(sp3)-C(sp3) Bond C57 - C58              | 1.36    | Ang.   |
| PLAT363_ALERT_2_C | Long     | C(sp3)-C(sp2) Bond C95 - C98              | 1.68    | Ang.   |
| PLAT369_ALERT_2_C | Long     | C(sp2)-C(sp2) Bond C78 - C79              | 1.53    | Ang.   |
| PLAT410_ALERT_2_C | Short    | Intra H...H Contact H10 ..H55B            | 1.96    | Ang.   |
| PLAT410_ALERT_2_C | Short    | Intra H...H Contact H22 ..H59A            | 1.94    | Ang.   |
| PLAT905_ALERT_3_C | Negative | K value in the Analysis of Variance ...   | -3.028  | Report |
| PLAT911_ALERT_3_C | Missing  | FCF Refl Between Thmin & Sth/L= 0.600     | 6       | Report |
| PLAT978_ALERT_2_C | Number   | C-C Bonds with Positive Residual Density. | 0       | Info   |

## ● Alert level G

FORMU01\_ALERT\_1\_G There is a discrepancy between the atom counts in the  
 \_chemical\_formula\_sum and \_chemical\_formula\_moiety. This is  
 usually due to the moiety formula being in the wrong format.  
 Atom count from \_chemical\_formula\_sum: C268 H418 F18 N6 O70 Ru6 S6  
 Atom count from \_chemical\_formula\_moiety: C268 H406 F18 N6 O70 Ru6 S6

FORMU01\_ALERT\_2\_G There is a discrepancy between the atom counts in the  
 \_chemical\_formula\_sum and the formula from the \_atom\_site\* data.  
 Atom count from \_chemical\_formula\_sum: C268 H418 F18 N6 O70 Ru6 S6  
 Atom count from the \_atom\_site data: C222 H246 N6 O12 Ru6

CELLZ01\_ALERT\_1\_G Difference between formula and atom\_site contents detected.

CELLZ01\_ALERT\_1\_G ALERT: Large difference may be due to a  
 symmetry error - see SYMMG tests  
 From the CIF: \_cell\_formula\_units\_Z 3  
 From the CIF: \_chemical\_formula\_sum C268 H418 F18 N6 O70 Ru6 S6  
 TEST: Compare cell contents of formula and atom\_site data

| atom | Z*formula | cif sites | diff   |
|------|-----------|-----------|--------|
| C    | 804.00    | 666.00    | 138.00 |
| H    | 1254.00   | 738.00    | 516.00 |
| F    | 54.00     | 0.00      | 54.00  |
| N    | 18.00     | 18.00     | 0.00   |
| O    | 210.00    | 36.00     | 174.00 |
| Ru   | 18.00     | 18.00     | 0.00   |
| S    | 18.00     | 0.00      | 18.00  |

|                   |                                                   |        |              |
|-------------------|---------------------------------------------------|--------|--------------|
| PLAT002_ALERT_2_G | Number of Distance or Angle Restraints on AtSite  | 8      | Note         |
| PLAT003_ALERT_2_G | Number of Uiso or Uij Restrained non-H Atoms ...  | 16     | Report       |
| PLAT033_ALERT_4_G | Flack x Value Deviates > 3.0 * sigma from Zero    | 0.447  | Note         |
| PLAT041_ALERT_1_G | Calc. and Reported SumFormula Strings Differ      |        | Please Check |
| PLAT042_ALERT_1_G | Calc. and Reported MoietyFormula Strings Differ   |        | Please Check |
| PLAT044_ALERT_1_G | Calculated and Reported Density Dx Differ by ..   | 0.4660 | Check        |
| PLAT051_ALERT_1_G | Mu(calc) and Mu(CIF) Ratio Differs from 1.0 by .. | 23.12  | %            |
| PLAT068_ALERT_1_G | Reported F000 Differs from Calcd (or Missing)...  |        | Please Check |
| PLAT072_ALERT_2_G | SHELXL First Parameter in WGHT Unusually Large    | 0.11   | Report       |
| PLAT152_ALERT_1_G | The Supplied and Calc. Volume s.u. Differ by ...  | 2      | Units        |
| PLAT172_ALERT_4_G | The CIF-Embedded .res File Contains DFIX Records  | 6      | Report       |
| PLAT177_ALERT_4_G | The CIF-Embedded .res File Contains DELU Records  | 9      | Report       |
| PLAT186_ALERT_4_G | The CIF-Embedded .res File Contains ISOR Records  | 3      | Report       |
| PLAT232_ALERT_2_G | Hirshfeld Test Diff (M-X) Ru1 --O1                | 6.3    | s.u.         |
| PLAT232_ALERT_2_G | Hirshfeld Test Diff (M-X) Ru1 --O2                | 6.2    | s.u.         |
| PLAT232_ALERT_2_G | Hirshfeld Test Diff (M-X) Ru1 --C83               | 5.5    | s.u.         |
| PLAT232_ALERT_2_G | Hirshfeld Test Diff (M-X) Ru2 --N2                | 7.4    | s.u.         |
| PLAT232_ALERT_2_G | Hirshfeld Test Diff (M-X) Ru3 --N3                | 7.7    | s.u.         |
| PLAT333_ALERT_2_G | Large Aver C6-Ring C-C Dist. C67 -C71_a           | 1.42   | Ang.         |
| PLAT333_ALERT_2_G | Large Aver C6-Ring C-C Dist. C69 -C69_a           | 1.42   | Ang.         |
| PLAT333_ALERT_2_G | Large Aver C6-Ring C-C Dist. C72 -C77             | 1.42   | Ang.         |

|                   |                                                    |        |            |
|-------------------|----------------------------------------------------|--------|------------|
| PLAT333_ALERT_2_G | Large Aver C6-Ring C-C Dist. C76                   | -C81   | 1.44 Ang.  |
| PLAT335_ALERT_2_G | Check Large C6 Ring C-C Range C72                  | -C77   | 0.19 Ang.  |
| PLAT335_ALERT_2_G | Check Large C6 Ring C-C Range C76                  | -C81   | 0.19 Ang.  |
| PLAT335_ALERT_2_G | Check Large C6 Ring C-C Range C82                  | -C87   | 0.20 Ang.  |
| PLAT343_ALERT_2_G | Unusual sp? Angle Range in Main Residue for        |        | C92 Check  |
| PLAT344_ALERT_2_G | Unusual sp? Angle Range in Solvent/Ion for         |        | C101 Check |
| PLAT380_ALERT_4_G | Incorrectly? Oriented X(sp2)-Methyl Moiety .....   |        | C108 Check |
| PLAT432_ALERT_2_G | Short Inter X...Y Contact C11                      | ..C99  | 3.14 Ang.  |
| PLAT432_ALERT_2_G | Short Inter X...Y Contact C23                      | ..C107 | 3.18 Ang.  |
| PLAT432_ALERT_2_G | Short Inter X...Y Contact C92                      | ..C101 | 1.76 Ang.  |
| PLAT432_ALERT_2_G | Short Inter X...Y Contact C93                      | ..C101 | 2.47 Ang.  |
| PLAT432_ALERT_2_G | Short Inter X...Y Contact C97                      | ..C101 | 2.94 Ang.  |
| PLAT606_ALERT_4_G | VERY LARGE Solvent Accessible VOID(S) in Structure |        | ! Info     |
| PLAT721_ALERT_1_G | Bond Calc 0.97000, Rep 0.96000 Dev...              |        | 0.01 Ang.  |
|                   | C99 -H99A 1.555 1.555 .....                        | # 235  | Check      |
| PLAT773_ALERT_2_G | Check long C-C Bond in CIF: C92                    | --C101 | 1.76 Ang.  |
| PLAT860_ALERT_3_G | Number of Least-Squares Restraints .....           |        | 45 Note    |
| PLAT869_ALERT_4_G | ALERTS Related to the Use of SQUEEZE Suppressed    |        | ! Info     |
| PLAT910_ALERT_3_G | Missing # of FCF Reflection(s) Below Theta(Min).   |        | 3 Note     |
| PLAT912_ALERT_4_G | Missing # of FCF Reflections Above STh/L= 0.600    |        | 130 Note   |
| PLAT913_ALERT_3_G | Missing # of Very Strong Reflections in FCF ....   |        | 1 Note     |
| PLAT933_ALERT_2_G | Number of OMIT Records in Embedded .res File ...   |        | 4 Note     |

---

1 **ALERT level A** = Most likely a serious problem - resolve or explain  
23 **ALERT level B** = A potentially serious problem, consider carefully  
74 **ALERT level C** = Check. Ensure it is not caused by an omission or oversight  
46 **ALERT level G** = General information/check it is not something unexpected

10 ALERT type 1 CIF construction/syntax error, inconsistent or missing data  
92 ALERT type 2 Indicator that the structure model may be wrong or deficient  
7 ALERT type 3 Indicator that the structure quality may be low  
35 ALERT type 4 Improvement, methodology, query or suggestion  
0 ALERT type 5 Informative message, check

---

## Publication of your CIF

You should attempt to resolve as many as possible of the alerts in all categories. Often the minor alerts point to easily fixed oversights, errors and omissions in your CIF or refinement strategy, so attention to these fine details can be worthwhile. In order to resolve some of the more serious problems it may be necessary to carry out additional measurements or structure refinements. However, the nature of your study may justify the reported deviations from journal submission requirements and the more serious of these should be commented upon in the discussion or experimental section of a paper or in the "special\_details" fields of the CIF. *checkCIF* was carefully designed to identify outliers and unusual parameters, but every test has its limitations and alerts that are not important in a particular case may appear. Conversely, the absence of alerts does not guarantee there are no aspects of the results needing attention. It is up to the individual to critically assess their own results and, if necessary, seek expert advice.

If you wish to submit your CIF for publication in Acta Crystallographica Section C or E, you should upload your CIF via the web. If you wish to submit your CIF for publication in IUCrData, you should upload your CIF via the web. If your CIF is to form part of a submission to another IUCr journal, you will be asked, either during electronic submission or by the Co-editor handling your paper, to upload your CIF via our web site.

Datablock I - ellipsoid plot

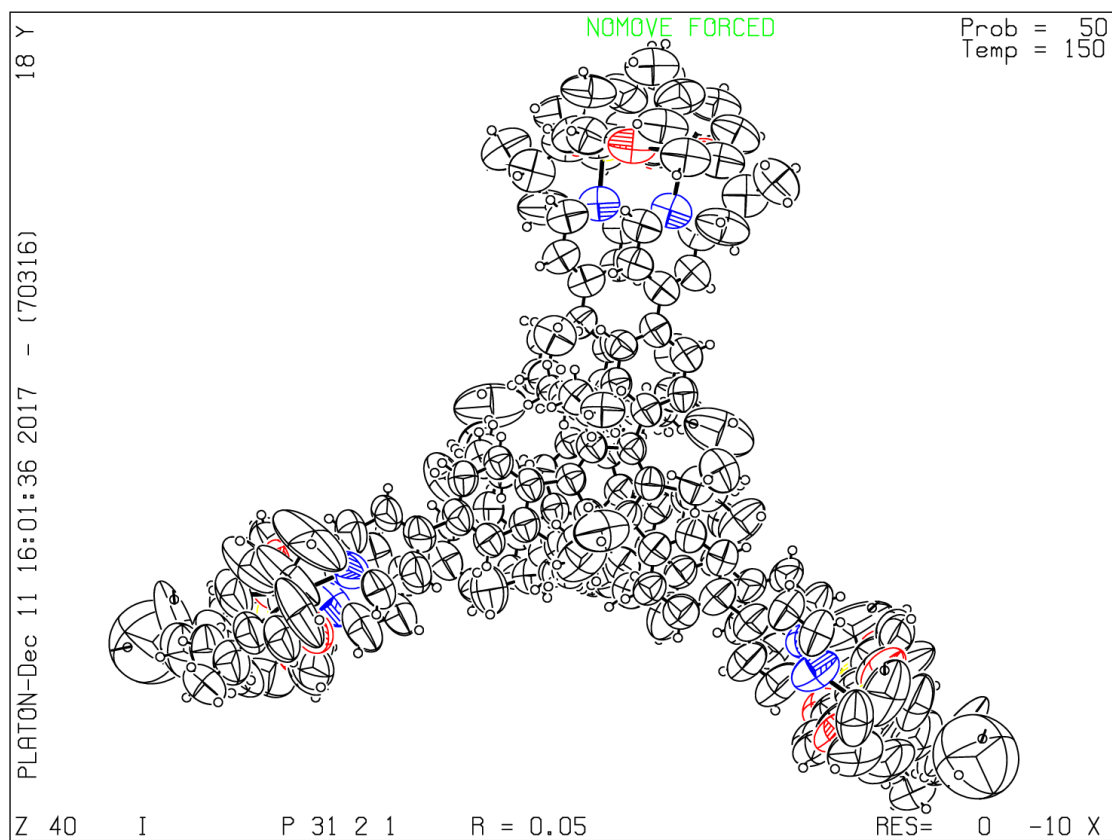

Supplement: s1 [file s1]
