# Supplementary material
Source: MDPI journal article supplement (https://www.mdpi.com/2304-6740/8/1/1)
Supplement: s1 [file s1]

## checkCIF (full publication check) running

## checkCIF/PLATON (full publication check)

Structure factors have been supplied for datablock(s) I

THIS REPORT IS FOR GUIDANCE ONLY. IF USED AS PART OF A REVIEW PROCEDURE FOR PUBLICATION, IT SHOULD NOT REPLACE THE EXPERTISE OF AN EXPERIENCED CRYSTALLOGRAPHIC REFEREE.

No syntax errors found.  
Please wait while processing ....

[CIF dictionary](#)  
[Interpreting this report](#)

[Structure factor report](#)

## Datablock: I

|                    |                                                 |                    |
|--------------------|-------------------------------------------------|--------------------|
| Bond precision:    | C-C = 0.0068 Å                                  | Wavelength=1.54184 |
| Cell:              | a=11.7717(4)      b=28.966(1)      c=16.9134(4) |                    |
|                    | alpha=90      beta=91.318(2)      gamma=90      |                    |
| Temperature: 150 K |                                                 |                    |

  

|                        | Calculated                   | Reported                |
|------------------------|------------------------------|-------------------------|
| Volume                 | 5765.6(3)                    | 5765.6(3)               |
| Space group            | P n                          | P 1 n 1                 |
| Hall group             | P -2yac                      | P -2yac                 |
| Moiety formula         | C66 H75 N3, C65 H72 N3, C H3 | 2(C66 H75 N3), 2 C6 H14 |
| Sum formula            | C132 H150 N6                 | C138 H164 N6            |
| Mr                     | 1820.58                      | 1906.75                 |
| Dx, g cm <sup>-3</sup> | 1.049                        | 1.098                   |
| Z                      | 2                            | 2                       |
| Mu (mm <sup>-1</sup> ) | 0.451                        | 0.470                   |
| F000                   | 1968.0                       | 2068.0                  |
| F000'                  | 1972.86                      |                         |
| h,k,lmax               | 14,36,21                     | 14,35,21                |
| Nref                   | 24270[ 12153]                | 15430                   |
| Tmin,Tmax              | 0.909,0.978                  | 0.690,1.000             |
| Tmin'                  | 0.909                        |                         |

Correction method= # Reported T Limits: Tmin=0.690 Tmax=1.000  
AbsCorr = MULTI-SCAN

Data completeness= 1.27/0.64      Theta(max)= 76.650

R(reflections)= 0.0759( 12872)      wR2(reflections)= 0.2305( 15430)

S = 1.058      Npar= 1247

The following ALERTS were generated. Each ALERT has the format

**test-name\_ALERT\_alert-type\_alert-level.**

Click on the hyperlinks for more details of the test.

### ● Alert level B

PLAT230\_ALERT\_2\_B Hirshfeld Test Diff for C121 -- C122 .. 7.2 su  
 PLAT234\_ALERT\_4\_B Large Hirshfeld Difference C57 -- C58B .. 0.30 Ang.  
 PLAT234\_ALERT\_4\_B Large Hirshfeld Difference C57 -- C58A .. 0.28 Ang.  
 PLAT360\_ALERT\_2\_B Short C(sp3)-C(sp3) Bond C56 - C57 .. 1.33 Ang.  
 PLAT410\_ALERT\_2\_B Short Intra H...H Contact H22 .. H43B .. 1.89 Ang.  
 PLAT410\_ALERT\_2\_B Short Intra H...H Contact H56A .. H57A .. 1.80 Ang.  
 PLAT915\_ALERT\_3\_B Low Friedel Pair Coverage ..... 30 %

### ● Alert level C

CHEMW03\_ALERT\_2\_C The ratio of given/expected molecular weight as  
 calculated from the \_atom\_site\* data lies outside  
 the range 0.99 <> 1.01

|                                        |         |
|----------------------------------------|---------|
| From the CIF: _cell_formula_units_Z    | 2       |
| From the CIF: _chemical_formula_weight | 1906.75 |

TEST: Calculate formula weight from \_atom\_site\_\*

| atom | mass  | num    | sum     |
|------|-------|--------|---------|
| C    | 12.01 | 132.00 | 1585.45 |
| H    | 1.01  | 150.00 | 151.20  |

N 14.01 6.00 84.04  
 Calculated formula weight 1820.69  
 STRVA01\_ALERT\_4\_C Flack test results are meaningless.  
 From the CIF: \_refine\_ls\_abs\_structure\_Flack 0.100  
 From the CIF: \_refine\_ls\_abs\_structure\_Flack\_su 0.800  
 PLAT041\_ALERT\_1\_C Calc. and Reported SumFormula Strings Differ Please Check  
 PLAT068\_ALERT\_1\_C Reported F000 Differs from Calcd (or Missing)... Please Check  
 PLAT213\_ALERT\_2\_C Atom N6 has ADP max/min Ratio ..... 3.4 prolat  
 PLAT213\_ALERT\_2\_C Atom C106 has ADP max/min Ratio ..... 3.5 prolat  
 PLAT220\_ALERT\_2\_C Large Non-Solvent C Ueq(max)/Ueq(min) Range 5.4 Ratio  
 PLAT220\_ALERT\_2\_C Large Non-Solvent C Ueq(max)/Ueq(min) Range 4.8 Ratio  
 PLAT222\_ALERT\_3\_C Large Non-Solvent H Uiso(max)/Uiso(min) ... 5.7 Ratio  
 PLAT222\_ALERT\_3\_C Large Non-Solvent H Uiso(max)/Uiso(min) ... 4.4 Ratio  
 PLAT234\_ALERT\_4\_C Large Hirshfeld Difference C45 -- C46 .. 0.16 Ang.  
**And 2 other PLAT234 Alerts**  
 More ...  
 PLAT241\_ALERT\_2\_C High Ueq as Compared to Neighbors for ..... C57 Check  
 PLAT242\_ALERT\_2\_C Low Ueq as Compared to Neighbors for ..... C45 Check  
**And 3 other PLAT242 Alerts**  
 More ...  
 PLAT340\_ALERT\_3\_C Low Bond Precision on C-C Bonds ..... 0.0068 Ang.  
 PLAT360\_ALERT\_2\_C Short C(sp3)-C(sp3) Bond C65 - C66 .. 1.42 Ang.  
 PLAT410\_ALERT\_2\_C Short Intra H...H Contact H13 .. H63B .. 1.98 Ang.  
**And 3 other PLAT410 Alerts**  
 More ...  
 PLAT911\_ALERT\_3\_C Missing # FCF Refl Between THmin & STh/L= 0.600 39 Report  
 PLAT918\_ALERT\_3\_C Reflection(s) with I(obs) much smaller I(calc) . 1 Check

## Alert level G

FORMU01\_ALERT\_1\_G There is a discrepancy between the atom counts in the  
 \_chemical\_formula\_sum and \_chemical\_formula\_moiety. This is  
 usually due to the moiety formula being in the wrong format.  
 Atom count from \_chemical\_formula\_sum: C138 H164 N6  
 Atom count from \_chemical\_formula\_moiety: C144 H178 N6  
 FORMU01\_ALERT\_2\_G There is a discrepancy between the atom counts in the  
 \_chemical\_formula\_sum and the formula from the \_atom\_site\* data.  
 Atom count from \_chemical\_formula\_sum: C138 H164 N6  
 Atom count from the \_atom\_site data: C132 H150 N6  
 CELLZ01\_ALERT\_1\_G Difference between formula and atom\_site contents detected.  
 CELLZ01\_ALERT\_1\_G ALERT: Large difference may be due to a  
 symmetry error - see SYMMG tests  
 From the CIF: \_cell\_formula\_units\_Z 2  
 From the CIF: \_chemical\_formula\_sum C138 H164 N6  
 TEST: Compare cell contents of formula and atom\_site data

| atom | Z*formula | cif sites | diff  |
|------|-----------|-----------|-------|
| C    | 276.00    | 264.00    | 12.00 |
| H    | 328.00    | 300.00    | 28.00 |
| N    | 12.00     | 12.00     | 0.00  |

PLAT002\_ALERT\_2\_G Number of Distance or Angle Restraints on AtSite 3 Note  
 PLAT005\_ALERT\_5\_G No \_iucr\_refine\_instructions\_details in the CIF Please Do !  
 PLAT032\_ALERT\_4\_G Std. Uncertainty on Flack Parameter Value High . 0.800 Report  
 PLAT042\_ALERT\_1\_G Calc. and Reported MoietyFormula Strings Differ Please Check  
 PLAT044\_ALERT\_1\_G Calculated and Reported Density Dx Differ by .. 0.0493 Check  
 PLAT072\_ALERT\_2\_G SHELXL First Parameter in WGHT Unusually Large. 0.14 Report  
 PLAT301\_ALERT\_3\_G Main Residue Disorder ..... Percentage = 1 Note  
 PLAT343\_ALERT\_2\_G Unusual sp3 Angle Range in Main Residue for C56 Check  
 PLAT343\_ALERT\_2\_G Unusual sp? Angle Range in Main Residue for C123 Check  
 PLAT344\_ALERT\_2\_G Unusual sp? Angle Range in Solvent/Ion for . C124 Check  
 PLAT432\_ALERT\_2\_G Short Inter X...Y Contact C122 .. C124 .. 2.60 Ang.  
 PLAT432\_ALERT\_2\_G Short Inter X...Y Contact C123 .. C124 .. 1.77 Ang.  
 PLAT606\_ALERT\_4\_G VERY LARGE Solvent Accessible VOID(S) in Structure ! Info  
 PLAT773\_ALERT\_2\_G Check long C-C Bond in CIF: C123 -- C124 . 1.77 Ang.  
 PLAT790\_ALERT\_4\_G Centre of Gravity not Within Unit Cell: Resd. # 3 Note  
 C H3  
 PLAT792\_ALERT\_1\_G The Model has Chirality at C85 (Polar SPGR) S Verify  
 PLAT860\_ALERT\_3\_G Number of Least-Squares Restraints ..... 4 Note  
 PLAT869\_ALERT\_4\_G ALERTS Related to the use of SQUEEZE Suppressed ! Info  
 PLAT910\_ALERT\_3\_G Missing # of FCF Reflection(s) Below Th(Min) ... 1 Report  
 PLAT912\_ALERT\_4\_G Missing # of FCF Reflections Above STh/L= 0.600 243 Note  
 PLAT961\_ALERT\_5\_G Dataset Contains no Negative Intensities ..... Please Check

0 **ALERT level A** = Most likely a serious problem - resolve or explain

7 **ALERT level B** = A potentially serious problem, consider carefully

26 **ALERT level C** = Check. Ensure it is not caused by an omission or oversight

25 **ALERT level G** = General information/check it is not something unexpected

8 ALERT type 1 CIF construction/syntax error, inconsistent or missing data

28 ALERT type 2 Indicator that the structure model may be wrong or deficient

9 ALERT type 3 Indicator that the structure quality may be low

11 ALERT type 4 Improvement, methodology, query or suggestion

2 ALERT type 5 Informative message, check

### Publication of your CIF

You should attempt to resolve as many as possible of the alerts in all categories. Often the minor alerts point to easily fixed oversights, errors and omissions in your CIF or refinement strategy, so attention to these fine details can be worthwhile. In order to resolve some of the more serious problems it may be necessary to carry out additional measurements or structure refinements. However, the nature of your study may justify the reported deviations from journal submission requirements and the more serious of these should be commented upon in the discussion or experimental section of a paper or in the "special\_details" fields of the CIF. *checkCIF* was carefully designed to identify outliers and unusual parameters, but every test has its limitations and alerts that are not important in a particular case may appear. Conversely, the absence of alerts does not guarantee there are no aspects of the results needing attention. It is up to the individual to critically assess their own results and, if necessary, seek expert advice.

If you wish to submit your CIF for publication in Acta Crystallographica Section C or E, you should upload your CIF via [the web](#). If your CIF is to form part of a submission to another IUCr journal, you will be asked, either during electronic [submission](#) or by the Co-editor handling your paper, to upload your CIF via our web site.

PLATON version of 21/06/2015; check.def file version of 21/06/2015

### Datablock I - ellipsoid plot

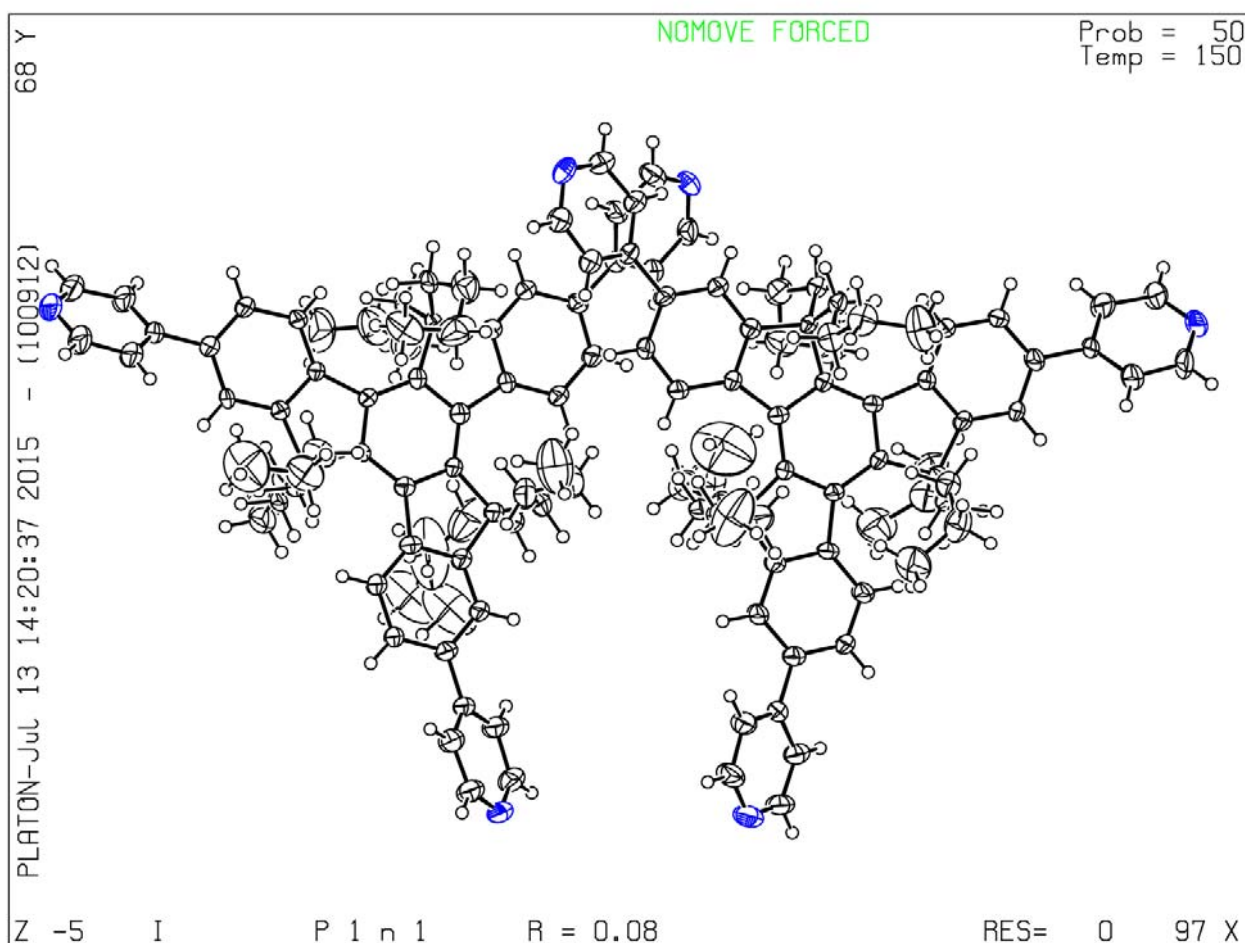

[Download CIF editor \(pubCIF\) from the IUCr](#)  
[Download CIF editor \(enCIFer\) from the CCDC](#)  
[Test a new CIF entry](#)
