# Supplementary material
Source: MDPI journal article supplement (https://www.mdpi.com/2304-6740/8/1/1)
Supplement: s1 [file s1]

# Supplementary Materials: Chiral Self-Sorting in Truxene-Based Metallacages

Simon Séjourné, Antoine Labrunie, Clément Dalinot, Amina Benchohra, Vincent Carré, Frédéric Aubriet, Magali Allain, Marc Sallé and Sébastien Goeb

|                                                                                                 |    |
|-------------------------------------------------------------------------------------------------|----|
| Figure S1. $^1\text{H}$ NMR spectrum of compound <b>2</b> in $\text{CDCl}_3$ .....              | 2  |
| Figure S2. $^{13}\text{C}$ NMR spectrum of compound <b>2</b> in $\text{CDCl}_3$ .....           | 2  |
| Figure S3. $^1\text{H}$ NMR spectrum of ligand <b>Trux3Pyr</b> in $\text{CDCl}_3$ .....         | 3  |
| Figure S4. $^{13}\text{C}$ NMR spectrum of ligand <b>Trux3Pyr</b> in $\text{CDCl}_3$ .....      | 3  |
| Figure S5. $^1\text{H}$ COSY NMR spectrum of ligand <b>Trux3Pyr</b> in $\text{CDCl}_3$ .....    | 4  |
| Figure S6. $^1\text{H}$ DOSY NMR spectrum of ligand <b>Trux3Pyr</b> in $\text{CDCl}_3$ .....    | 4  |
| Figure S7. $^1\text{H}$ NMR spectrum of ligand <b>Trux3Pyr</b> in MeOD.....                     | 5  |
| Figure S8. $^1\text{H}$ COSY NMR spectrum of ligand <b>Trux3Pyr</b> in MeOD.....                | 5  |
| Figure S9. $^1\text{H}$ DOSY NMR spectrum of ligand <b>Trux3Pyr</b> in MeOD.....                | 6  |
| Figure S10. $^1\text{H}$ NMR spectrum of <b>TruxNaph</b> in MeOD.....                           | 6  |
| Figure S11. $^1\text{H}$ COSY NMR spectrum of <b>TruxNaph</b> in MeOD.....                      | 7  |
| Figure S12. $^1\text{H}$ DOSY NMR spectrum of <b>TruxNaph</b> in MeOD.....                      | 7  |
| Figure S13. $^1\text{H}$ NMR spectrum of <b>TruxTetra</b> in MeOD.....                          | 8  |
| Figure S14. $^1\text{H}$ COSY NMR spectrum of <b>TruxTetra</b> in MeOD.....                     | 8  |
| Figure S15. $^1\text{H}$ DOSY NMR spectrum of <b>TruxTetra</b> in MeOD.....                     | 9  |
| Figure S16. ESI-FTICR HRMS spectrum of <b>TruxNaph</b> in MeOH at $C = 10^{-4}$ M.....          | 10 |
| Figure S17. ESI-FTICR HRMS spectrum of <b>TruxTetra</b> in MeOH at $C = 10^{-4}$ M.....         | 10 |
| Figure S18. Representation of Bailar twist angles in <b>TruxNaph</b> and <b>TruxTetra</b> ..... | 10 |

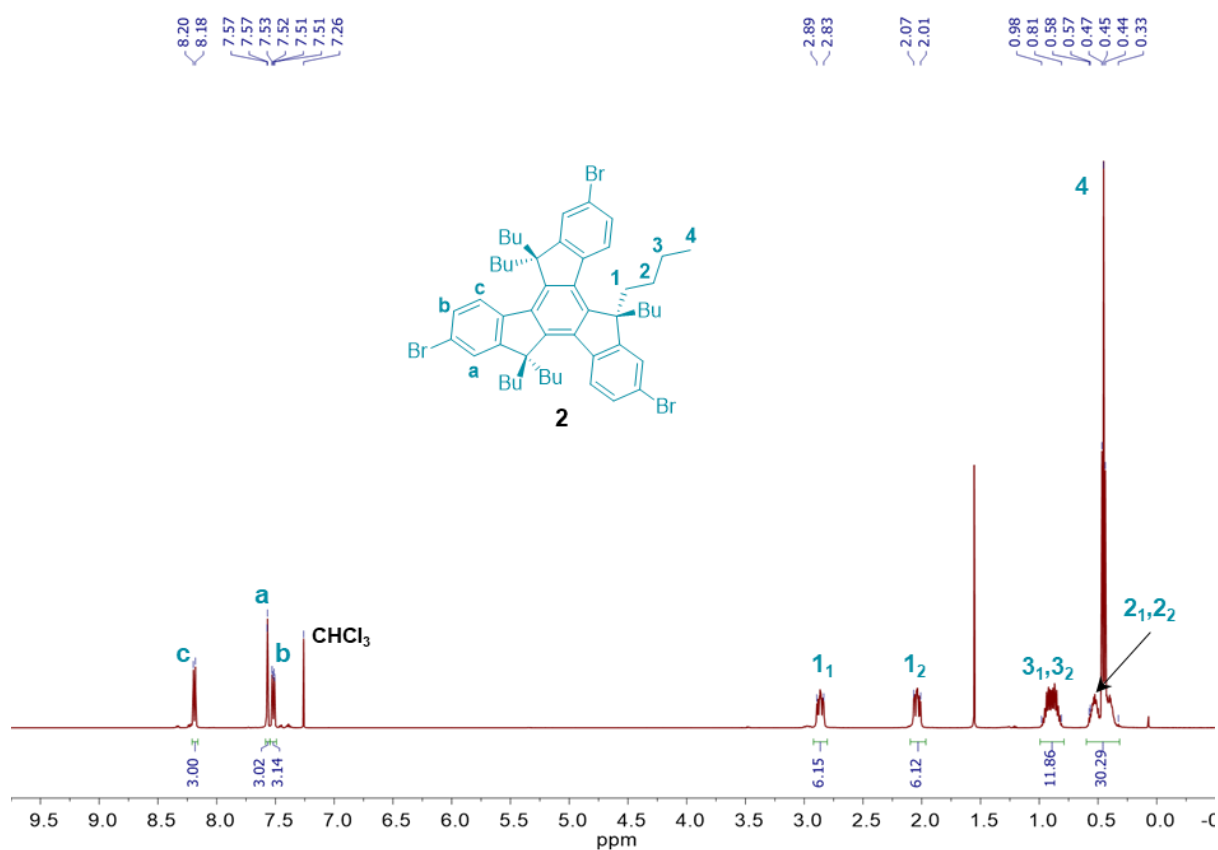

**Figure S1.** <sup>1</sup>H NMR spectrum of compound **2** in CDCl<sub>3</sub>.

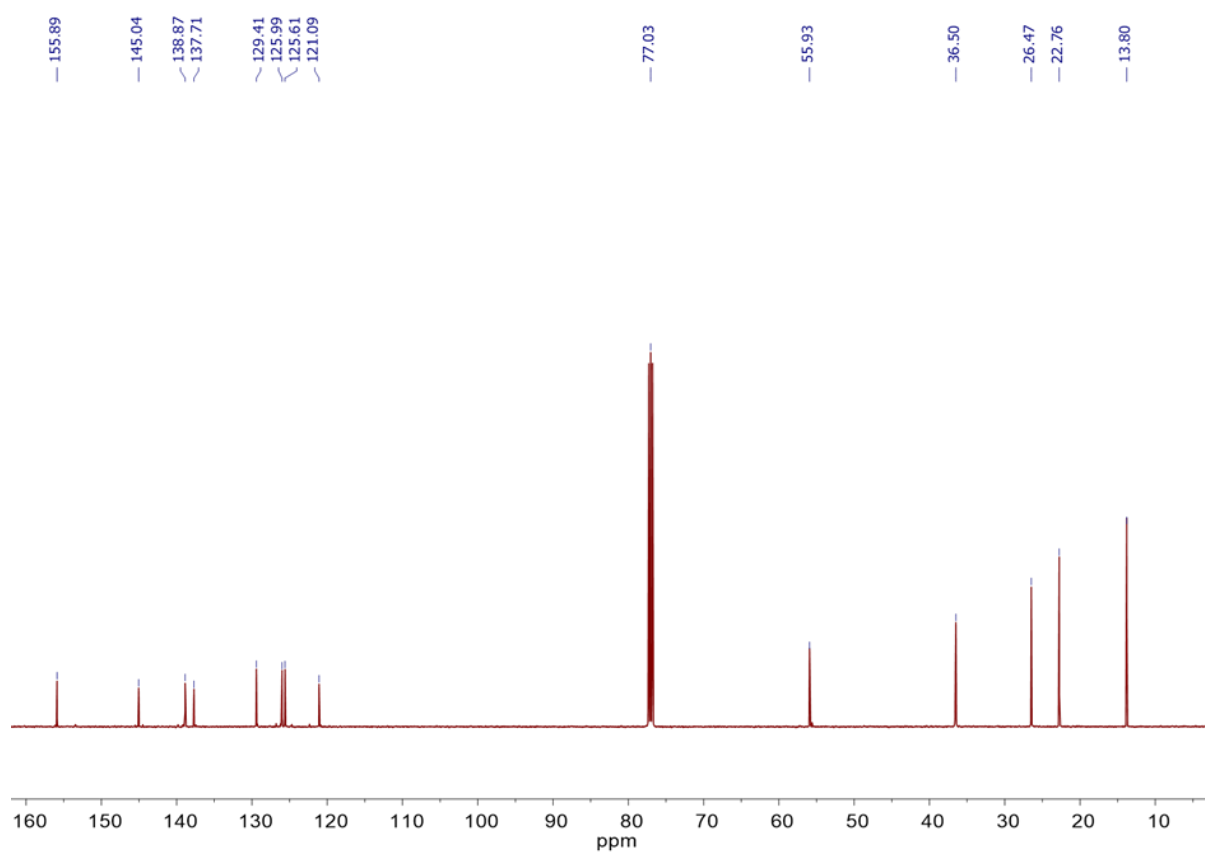

**Figure S2.** <sup>13</sup>C NMR spectrum of compound **2** in CDCl<sub>3</sub>.

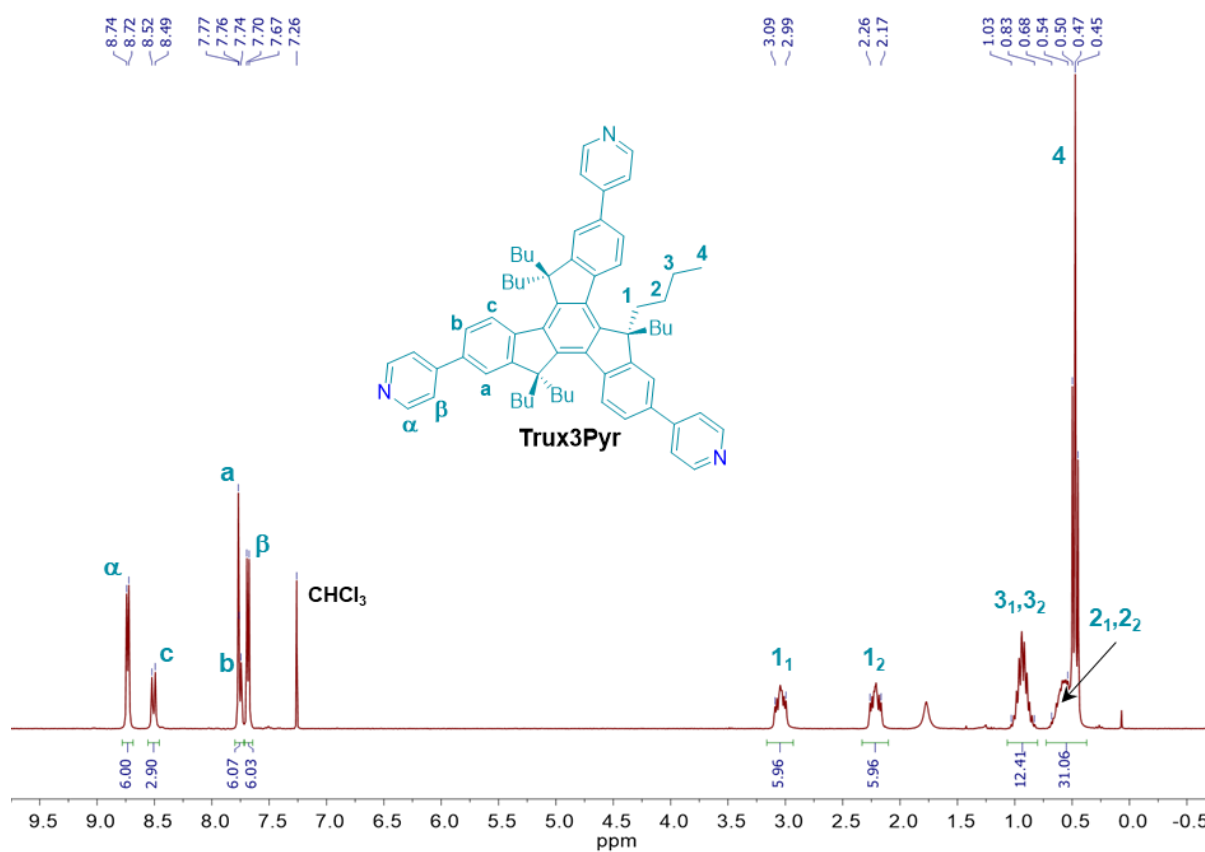

**Figure S3.** <sup>1</sup>H NMR spectrum of ligand **Trux3Pyr** in CDCl<sub>3</sub>.

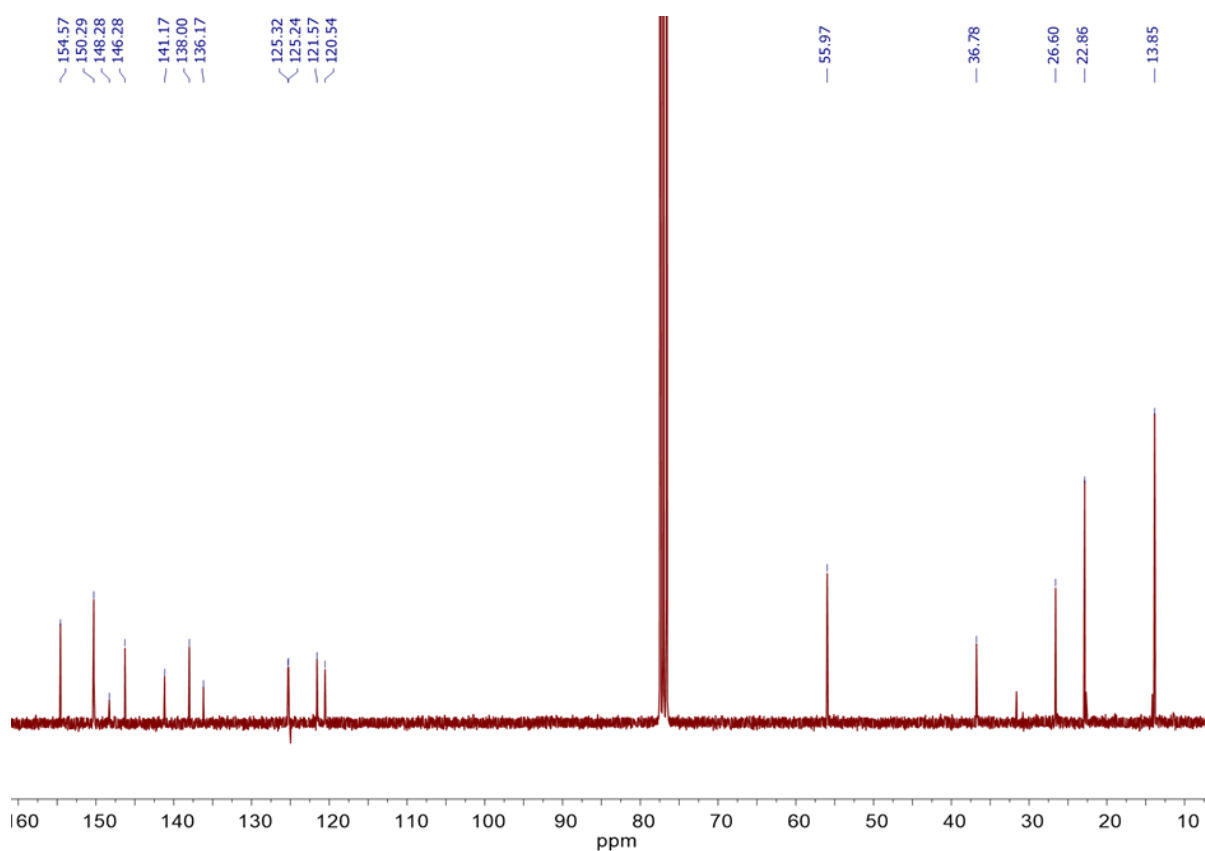

**Figure S4.** <sup>13</sup>C NMR spectrum of ligand **Trux3Pyr** in CDCl<sub>3</sub>.

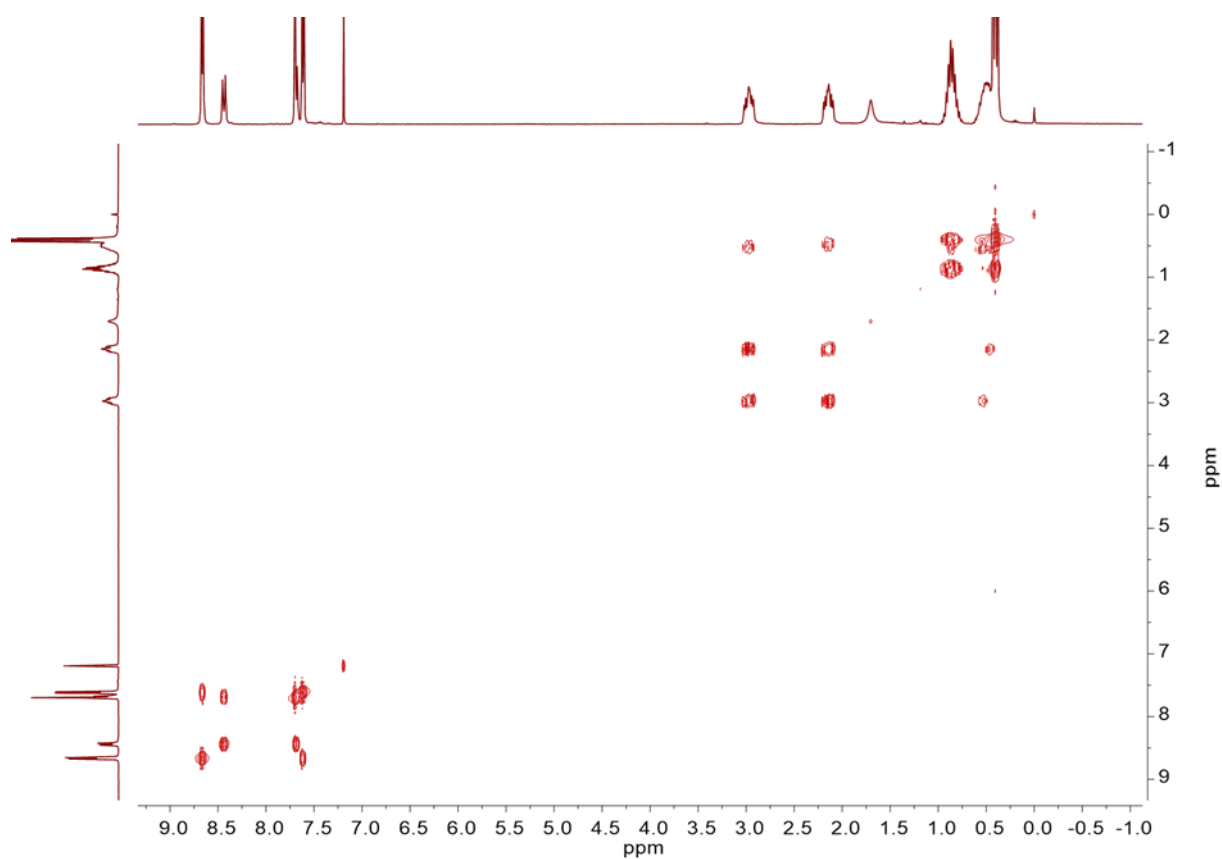

**Figure S5.**  $^1\text{H}$  COSY NMR spectrum of ligand **Trux3Pyr** in  $\text{CDCl}_3$ .

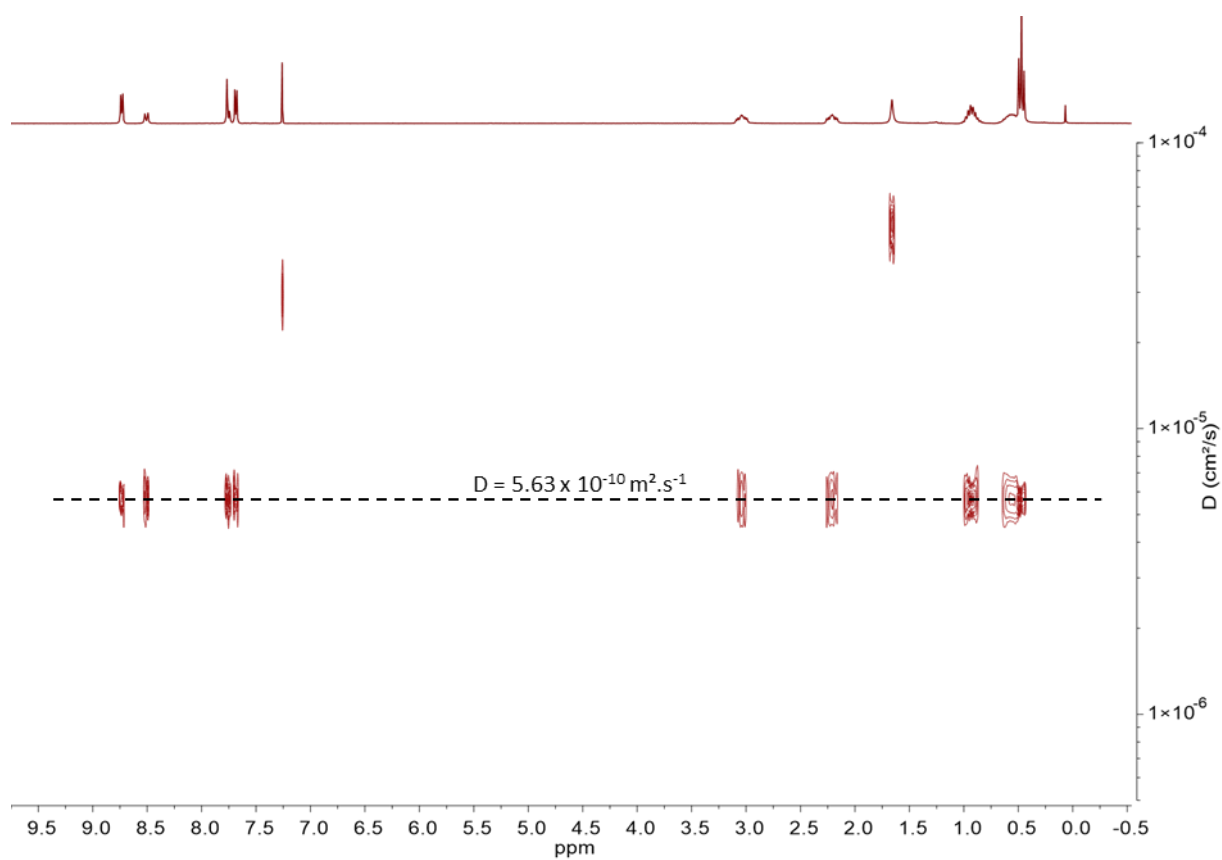

**Figure S6.**  $^1\text{H}$  DOSY NMR spectrum of ligand **Trux3Pyr** in  $\text{CDCl}_3$ .

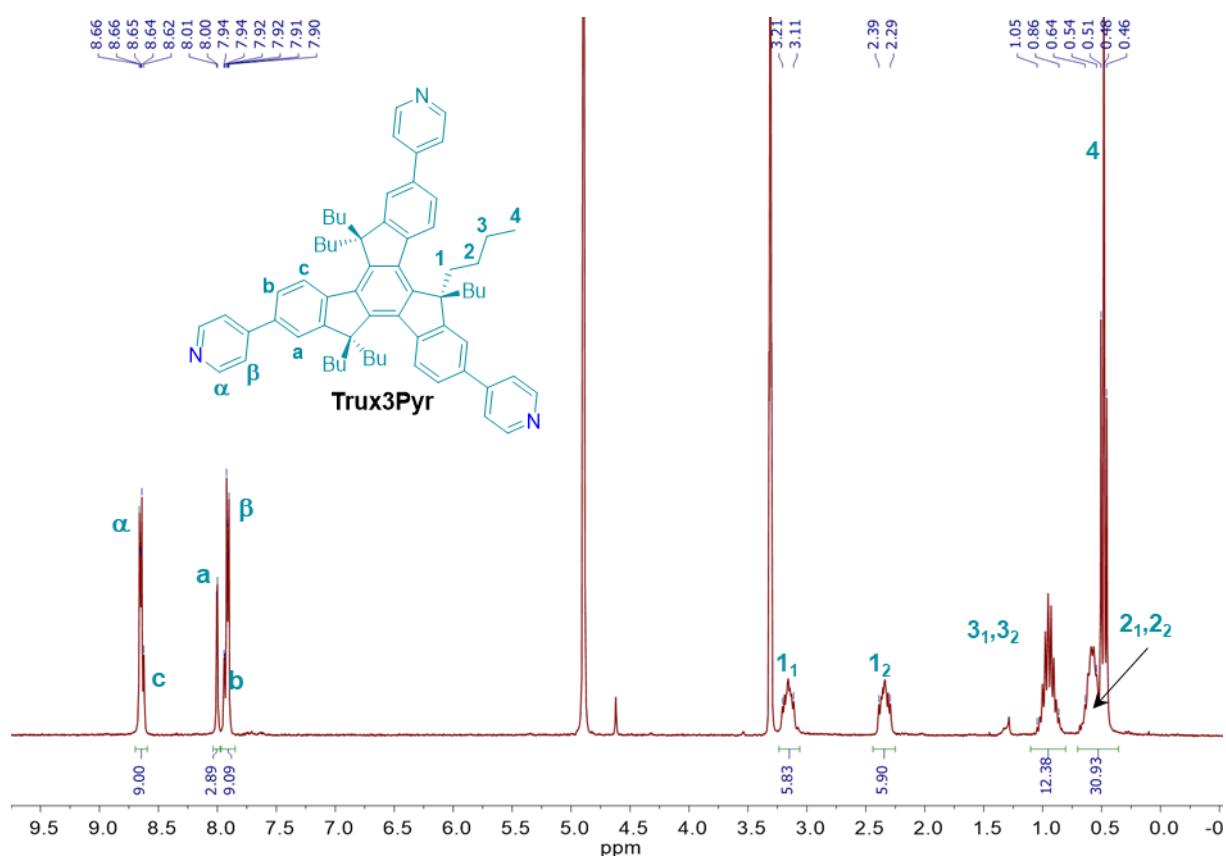

**Figure S7.**  $^1\text{H}$  NMR spectrum of ligand **Trux3Pyr** in MeOD.

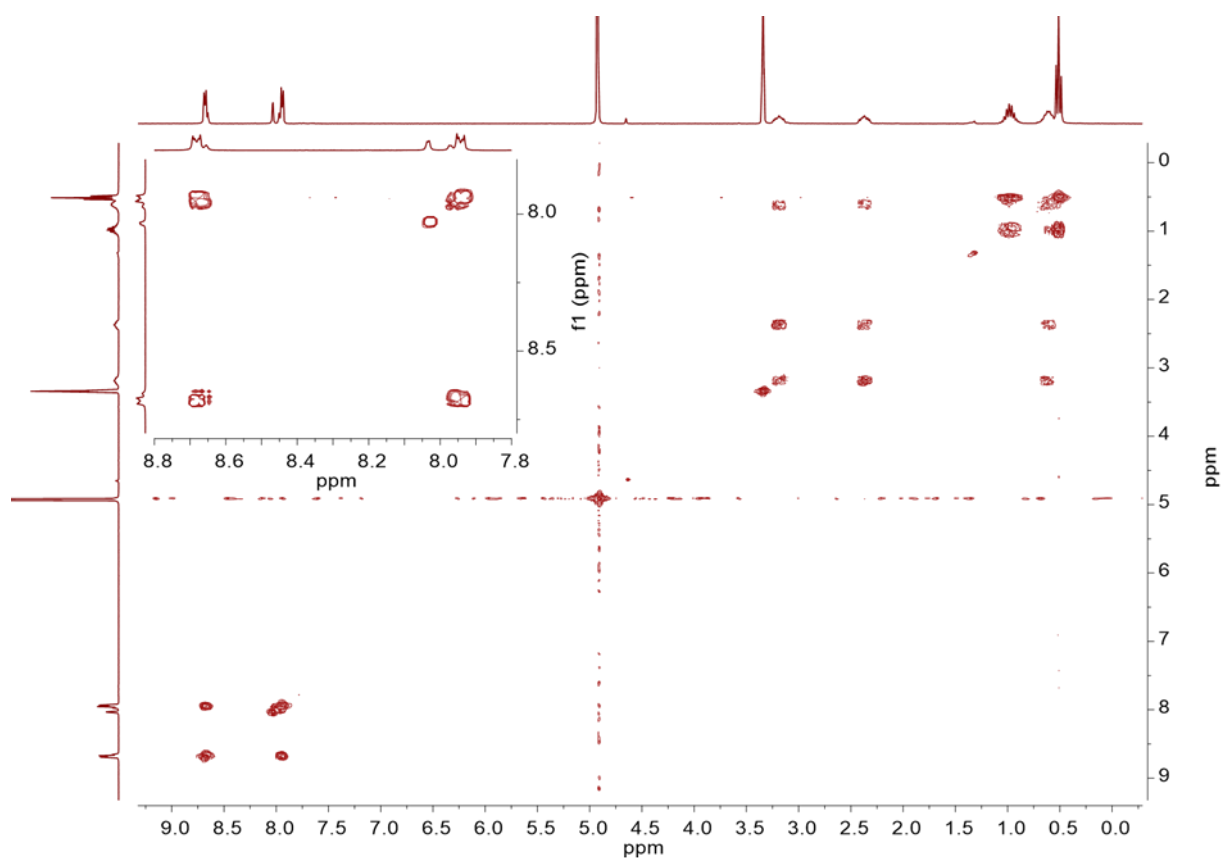

**Figure S8.**  $^1\text{H}$  COSY NMR spectrum of ligand **Trux3Pyr** in MeOD.

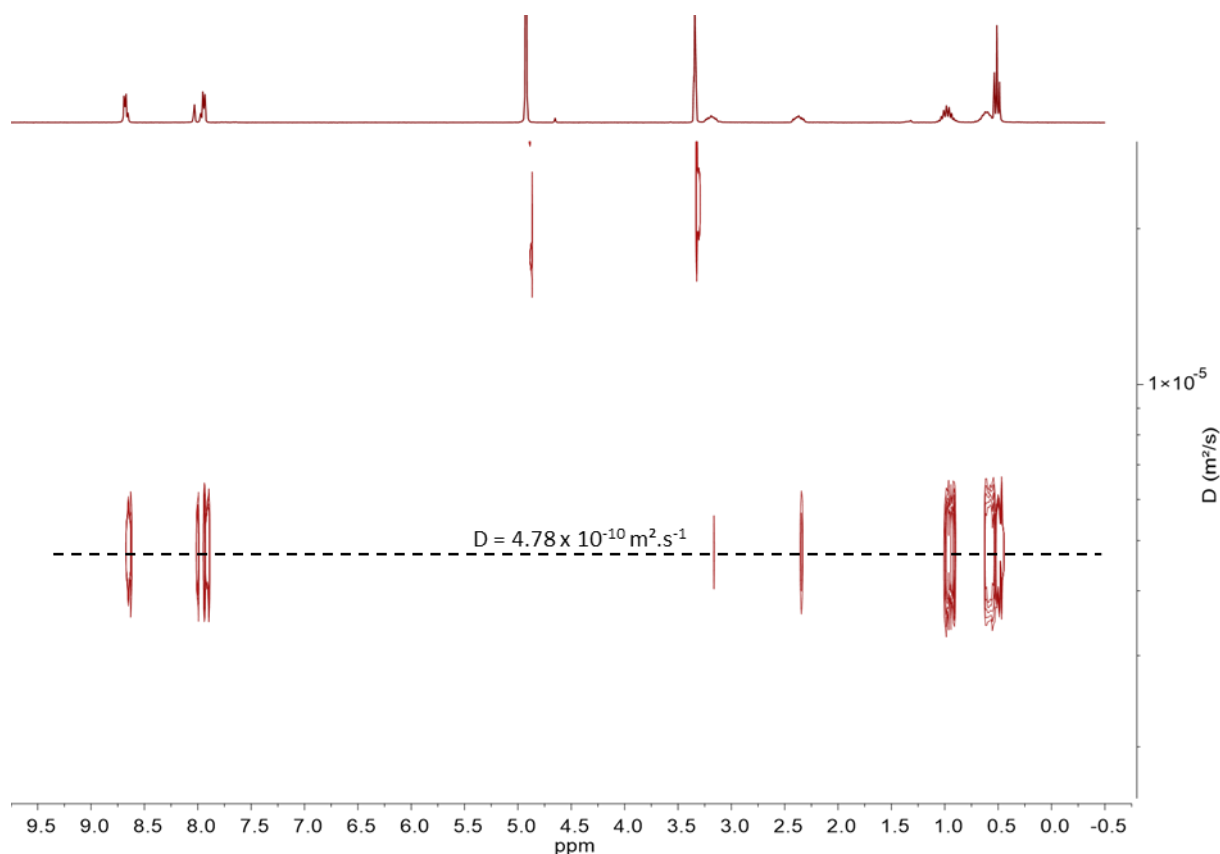

**Figure S9.**  $^1\text{H}$  DOSY NMR spectrum of ligand **Trux3Pyr** in  $\text{MeOD}$ .

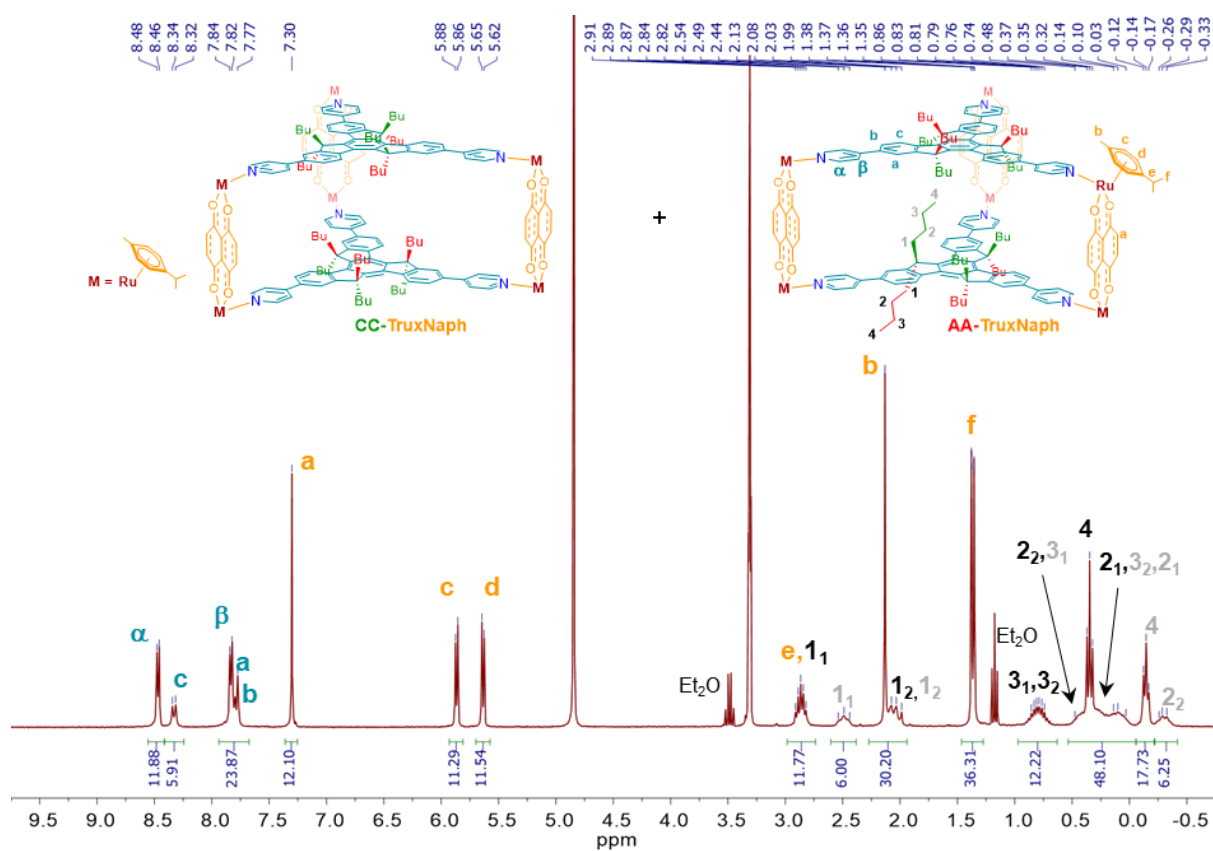

**Figure S10.**  $^1\text{H}$  NMR spectrum of **TruxNaph** in  $\text{MeOD}$ .

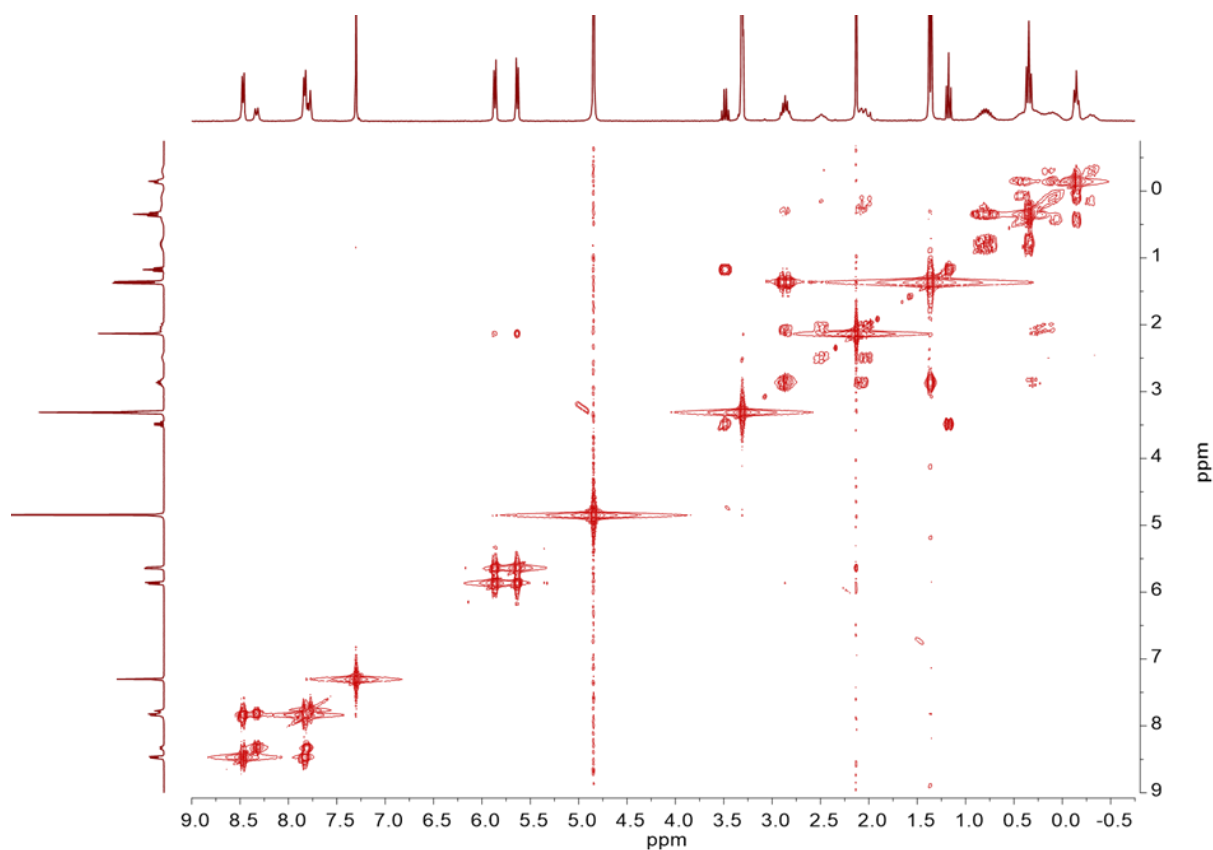

**Figure S11.**  $^1\text{H}$  COSY NMR spectrum of **TruxNaph** in MeOD.

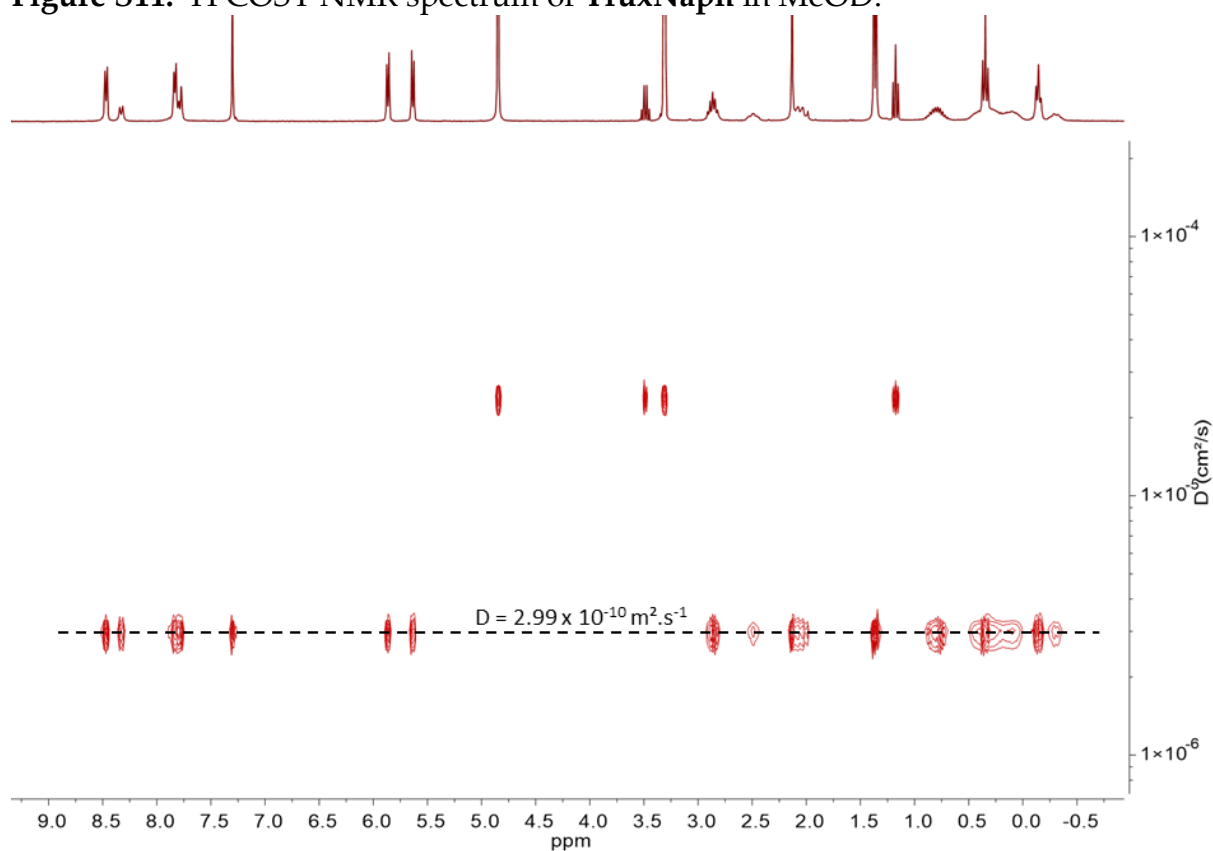

**Figure S12.**  $^1\text{H}$  DOSY NMR spectrum of **TruxNaph** in MeOD.

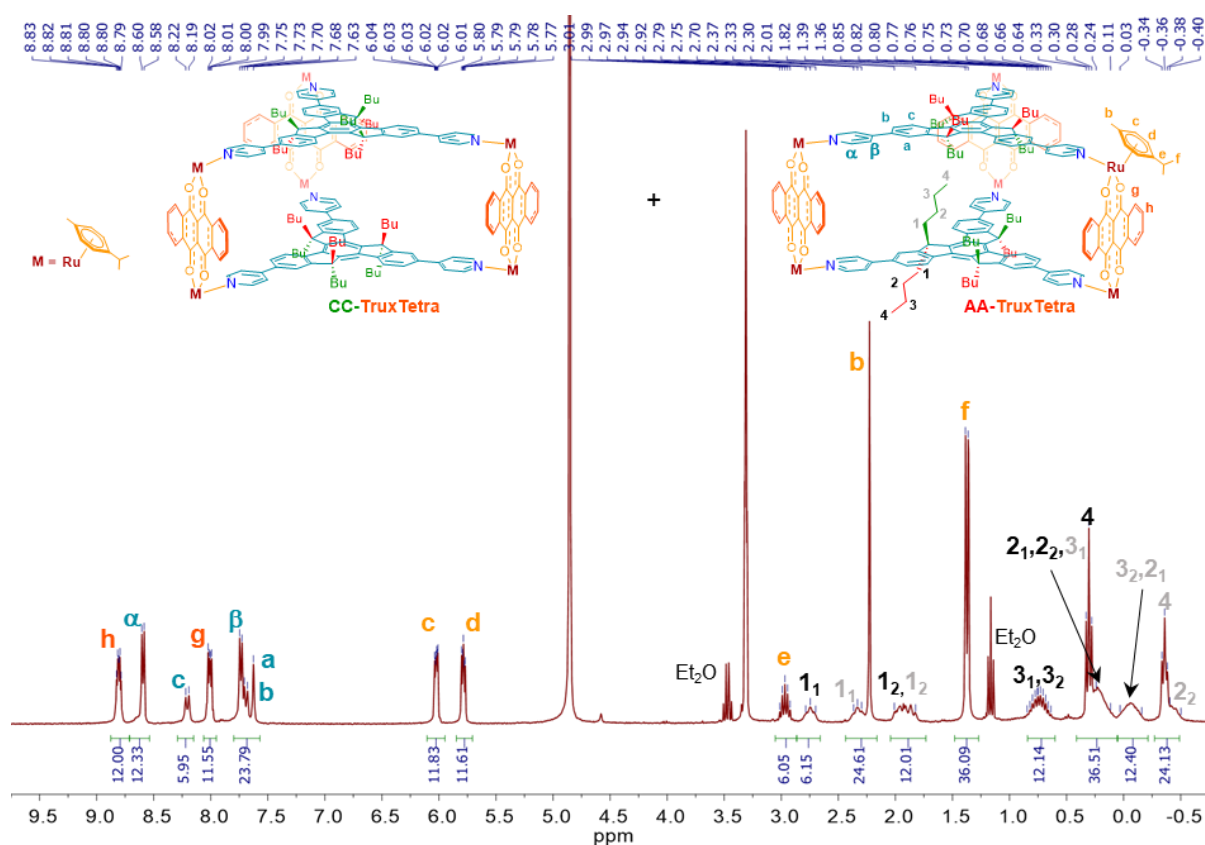

Figure S13.  $^1\text{H}$  NMR spectrum of TruxTetra in MeOD.

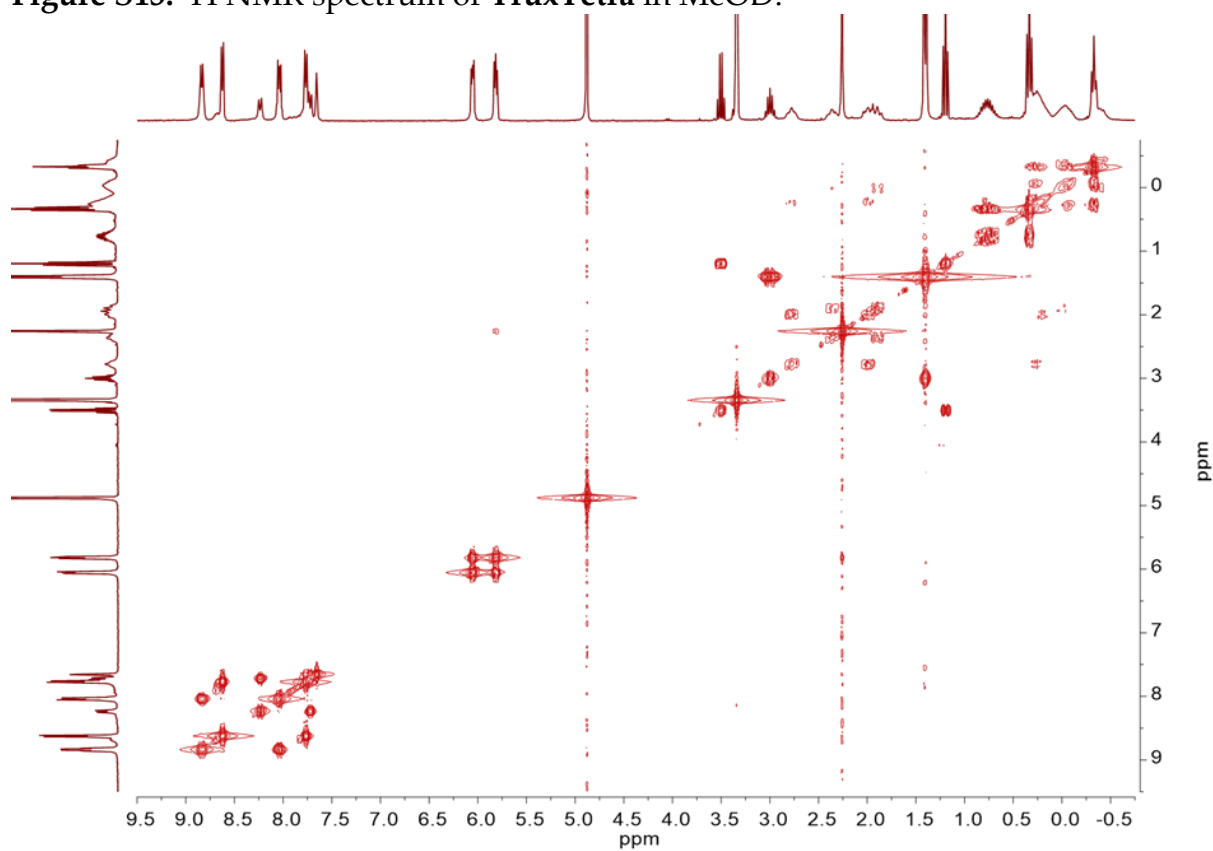

Figure S14.  $^1\text{H}$  COSY NMR spectrum of TruxTetra in MeOD.



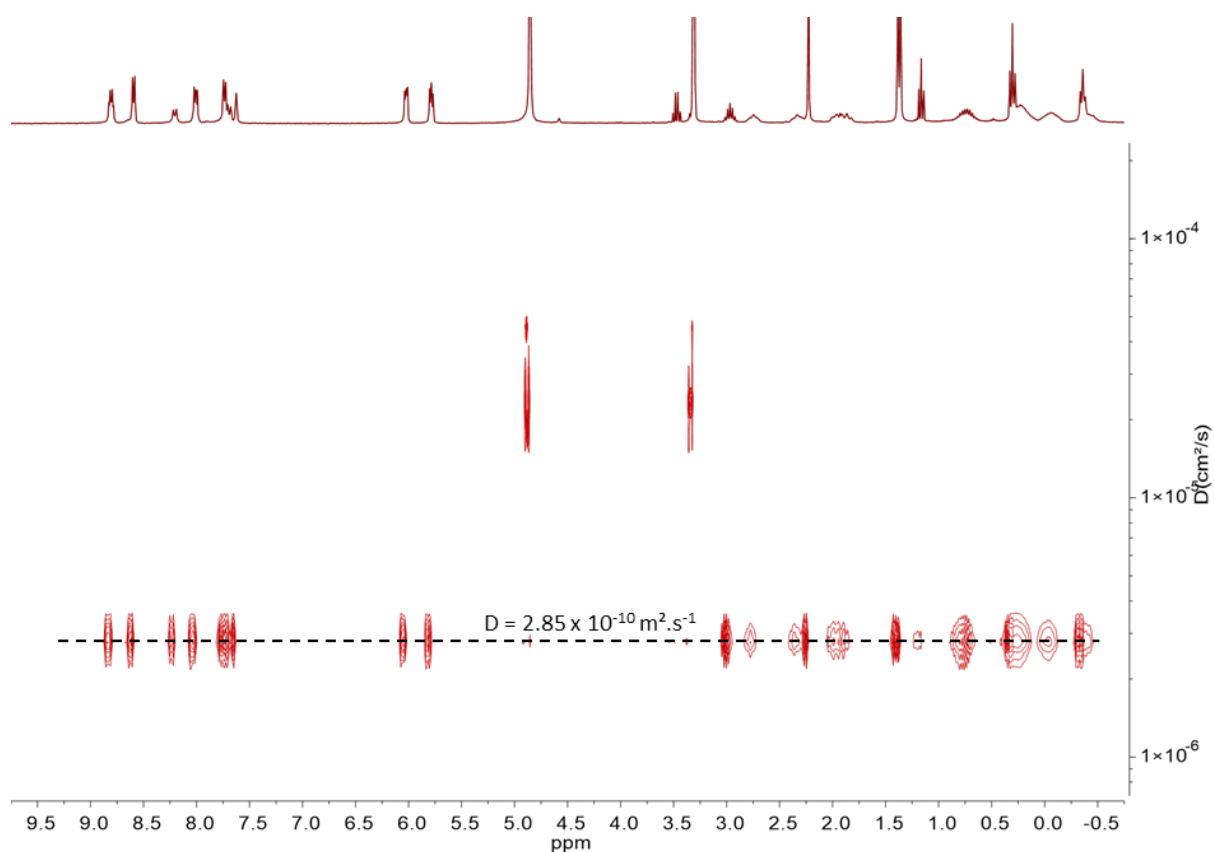

**Figure S15.**  $^1\text{H}$  DOSY NMR spectrum of **TruxTetra** in MeOD.

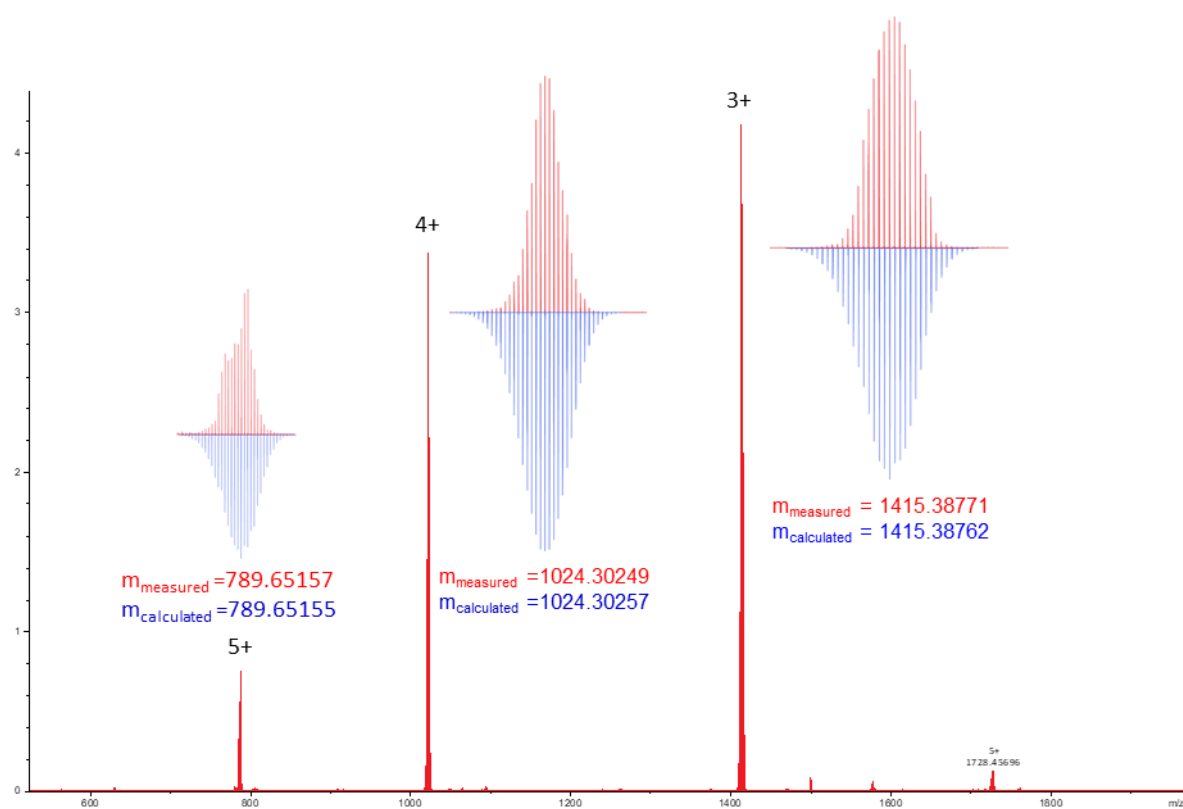

**Figure S16.** ESI-FTICR HRMS spectrum of **TruxNaph** in MeOH at  $C = 10^{-4}$  M.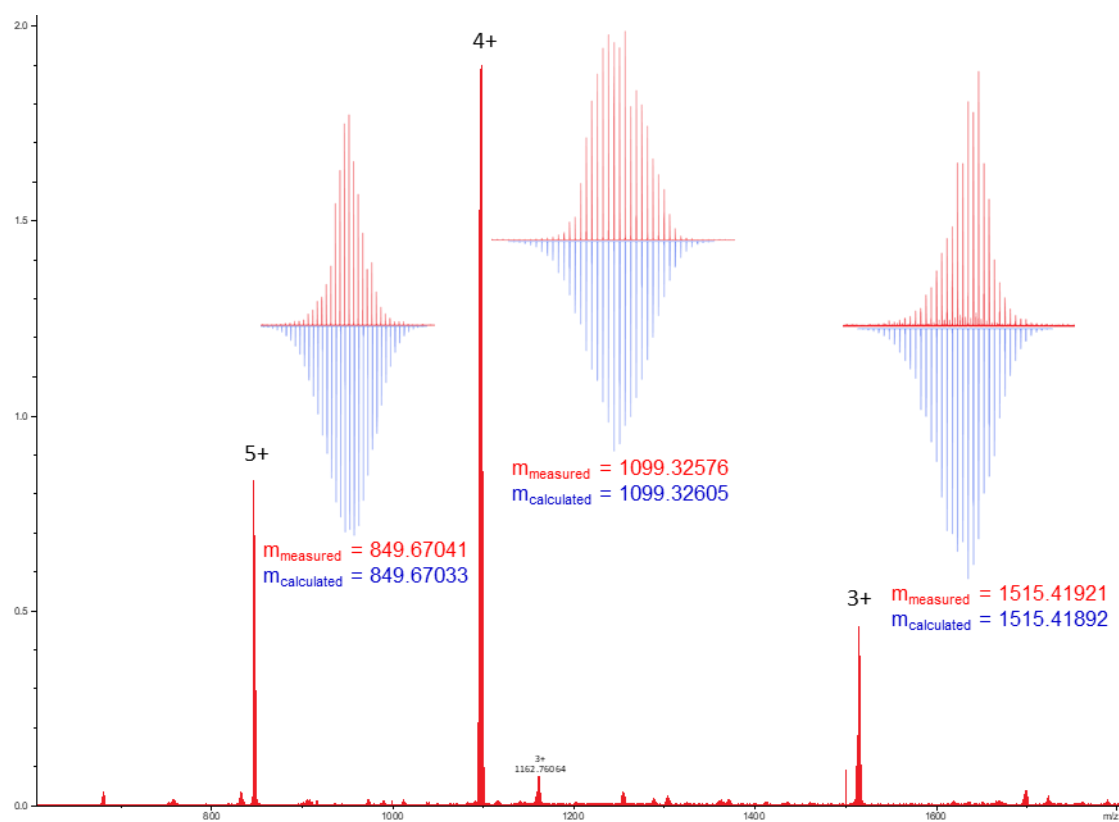**Figure S17.** ESI-FTICR HRMS spectrum of **TruxTetra** in MeOH at  $C = 10^{-4}$  M.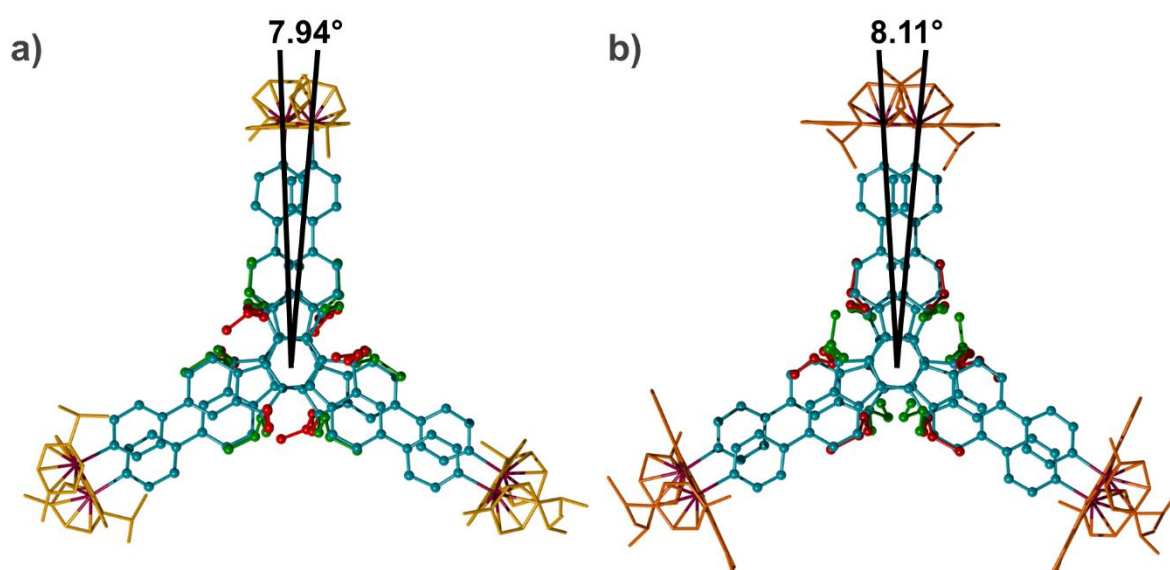**Figure S18.** Representation of Bailar twist angles in **TruxNaph** and **TruxTetra**.
